# Supplementary material for: Design, synthesis and evaluation of 3-phenoxypyrazine-2-carboxamide derivatives as potent TGR5 agonists
Source: Royal Society of Chemistry journal article supplement (doi:10.1039/d1ra08867j), 2022-01-01

## Design, synthesis and evaluation of 3-phenoxy pyrazine-2-carboxamide derivatives as potent TGR5 agonists

Shizhen Zhao<sup>a,#</sup>; Le Wang<sup>a,#</sup>; Jie Wang<sup>a</sup>; Chenwei Wang<sup>a</sup>; Shaowei Zheng<sup>a</sup>; Yajie Fu<sup>a</sup>, Yunfu Li<sup>a</sup>; Wei-Dong Chen<sup>a,b</sup>; Ruifang Hou<sup>a,\*</sup>, Dongbin Yang<sup>a,\*</sup>, Yan-Dong Wang<sup>c,\*</sup>

<sup>a</sup>Key Laboratory of Receptors-Mediated Gene Regulation and Drug Discovery, Hebi Key Laboratory of Liver Disease, People's Hospital of Hebi, School of Medicine, Henan University, Kaifeng, China

<sup>b</sup> Key Laboratory of Molecular Pathology, School of Basic Medical Science, Inner Mongolia Medical University, Hohhot, China

<sup>c</sup> State Key Laboratory of Chemical Resource Engineering, College of Life Science and Technology, Beijing University of Chemical Technology, Beijing, China

# These authors contributed equally to this work.

\*Corresponding author: E-mail addresses: [dr\\_rfhou@126.com](mailto:dr_rfhou@126.com) (R.H); [dongbinyang@126.com](mailto:dongbinyang@126.com) (D.Y); [ydwangbuct2009@163.com](mailto:ydwangbuct2009@163.com) (Y.-D.W.)

## Supporting Information

### Table of Contents:

<sup>1</sup>H NMR and <sup>13</sup>C NMR spectra of compounds **18a-u**.

<sup>1</sup>H NMR and <sup>13</sup>C NMR spectra of **18a**

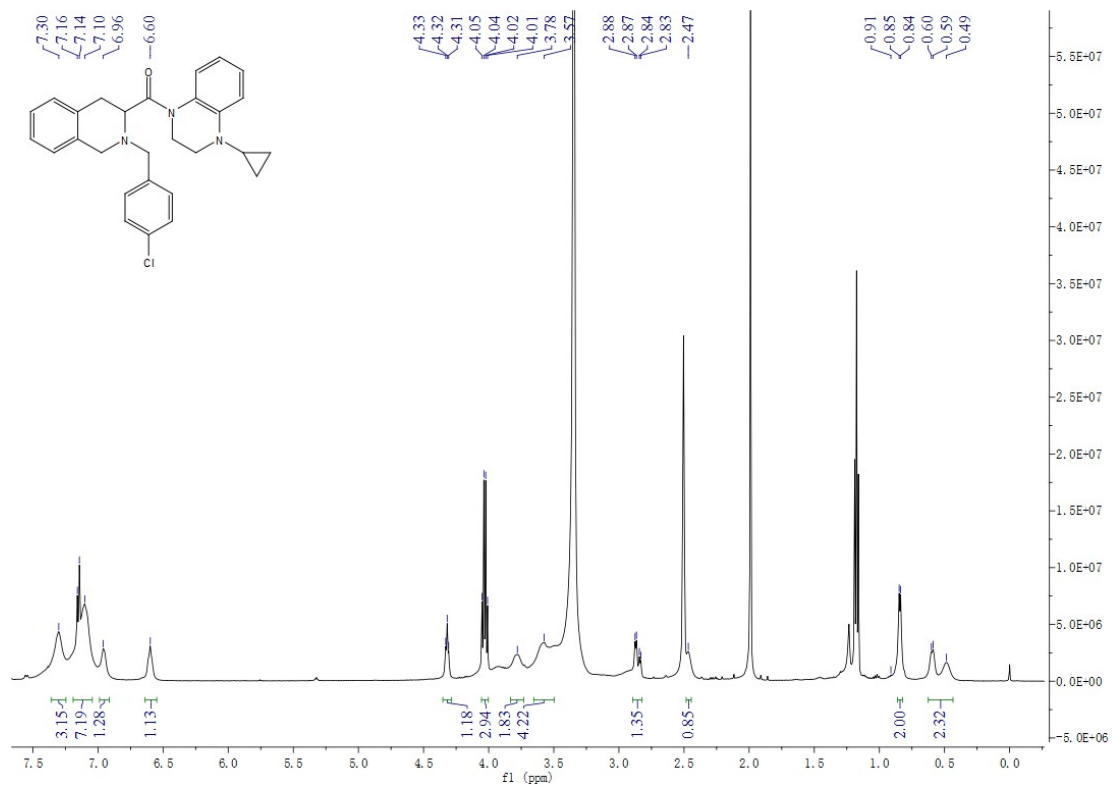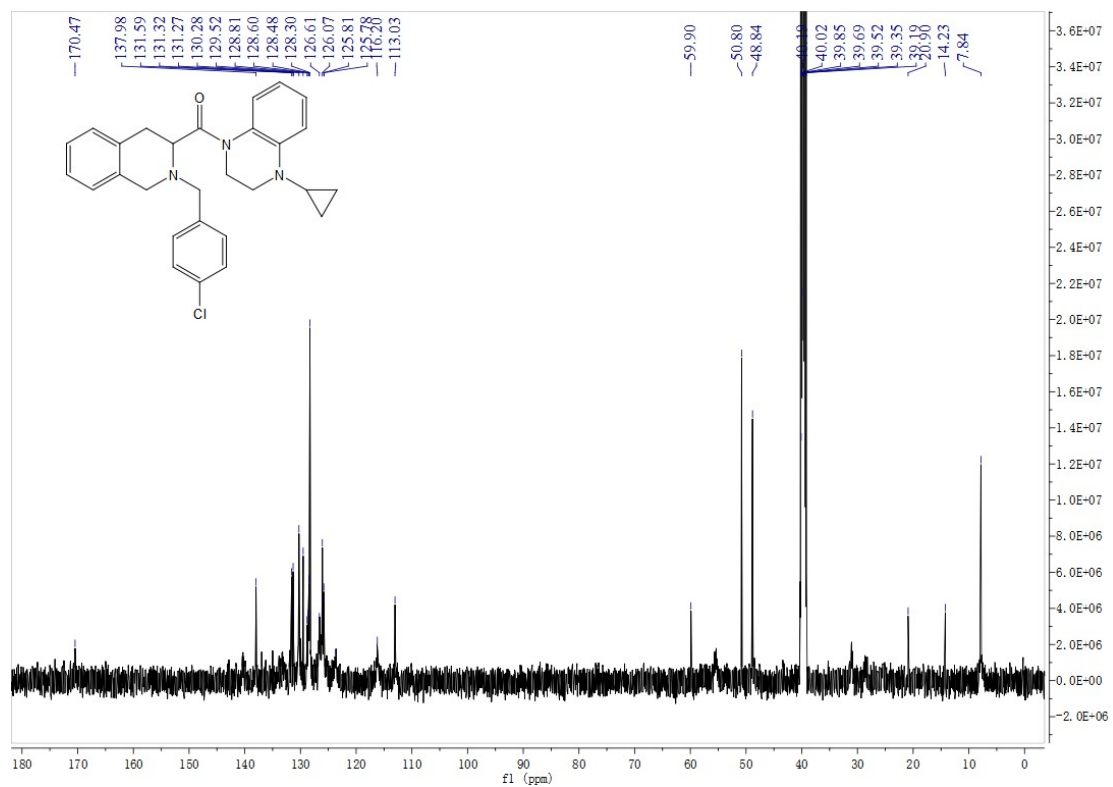

$^1\text{H}$  NMR and  $^{13}\text{C}$  NMR spectra of **18b**

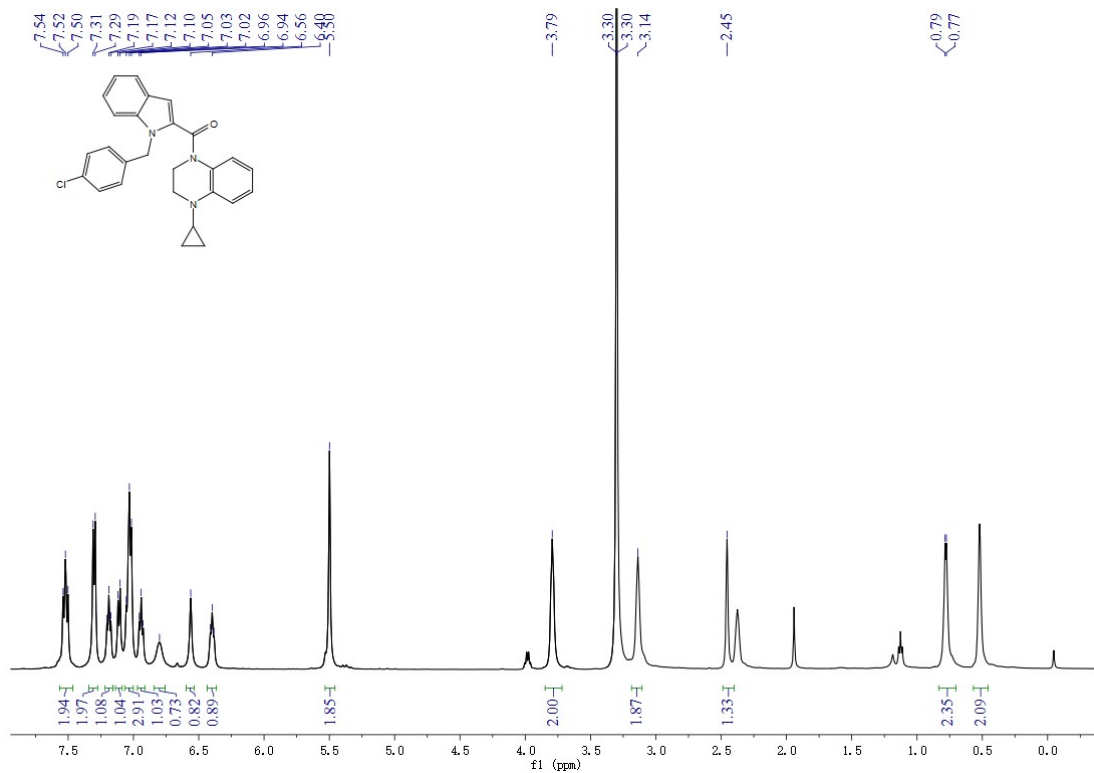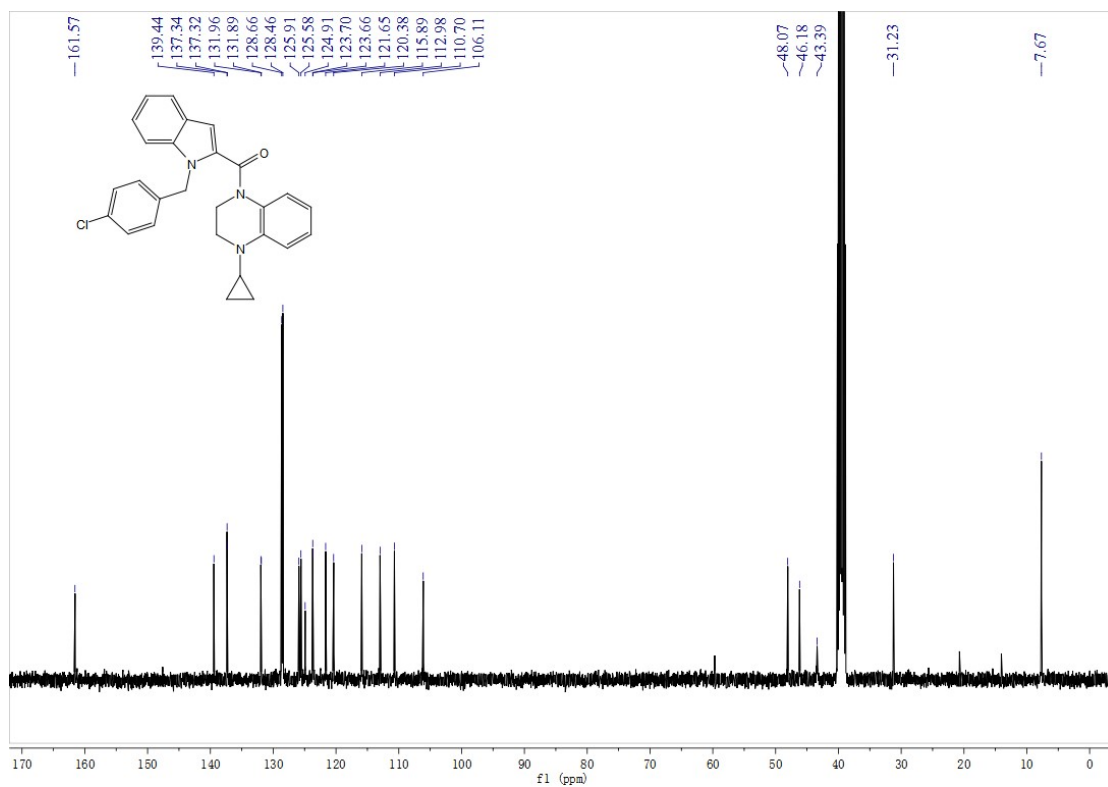

<sup>1</sup>H NMR and <sup>13</sup>C NMR spectra of **18c**

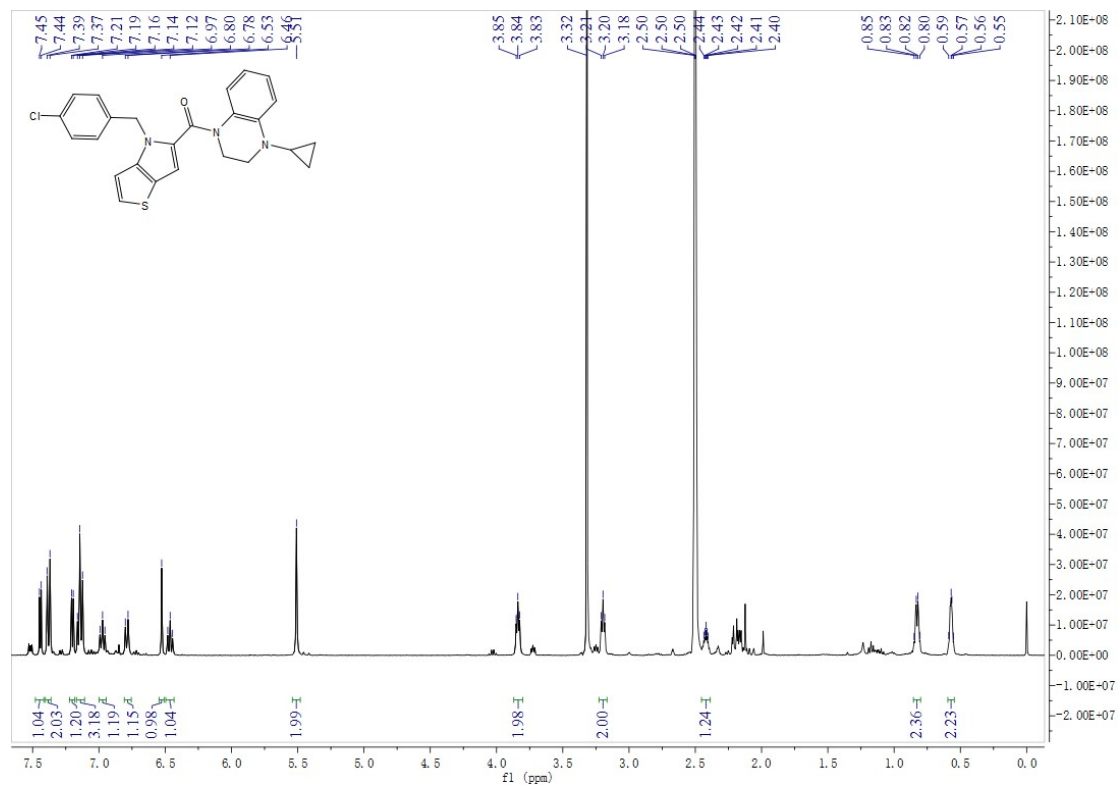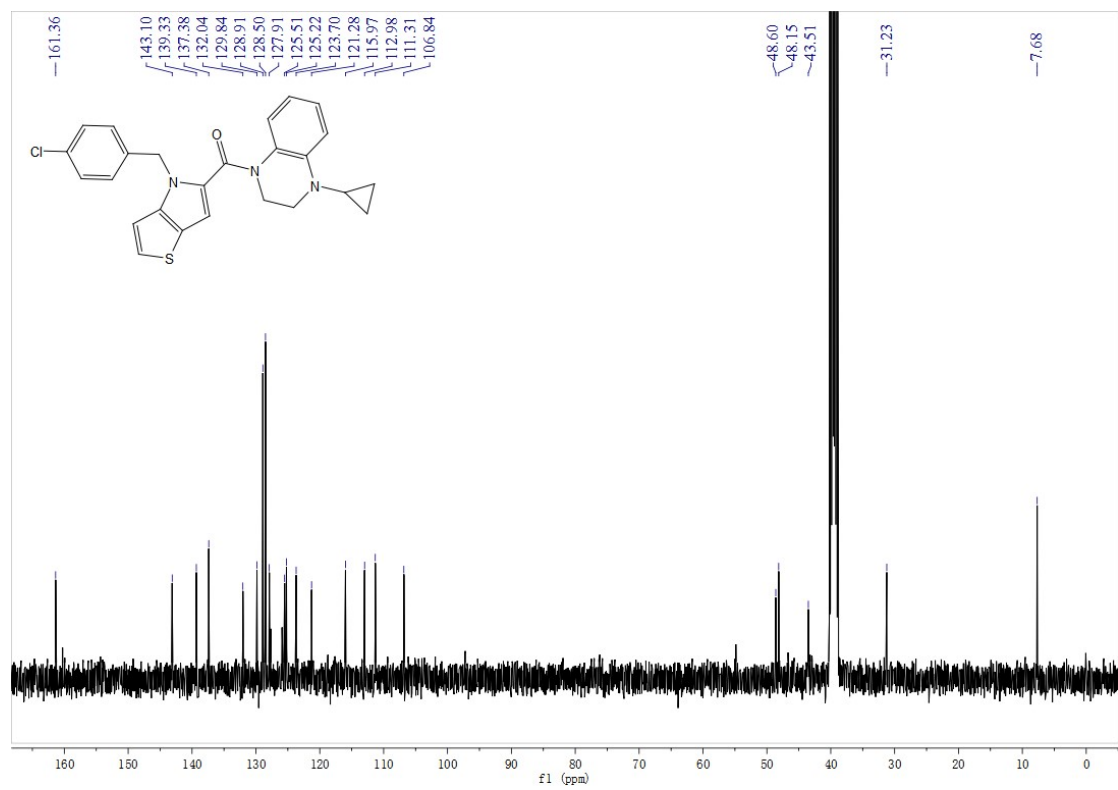

<sup>1</sup>H NMR and <sup>13</sup>C NMR spectra of **18d**

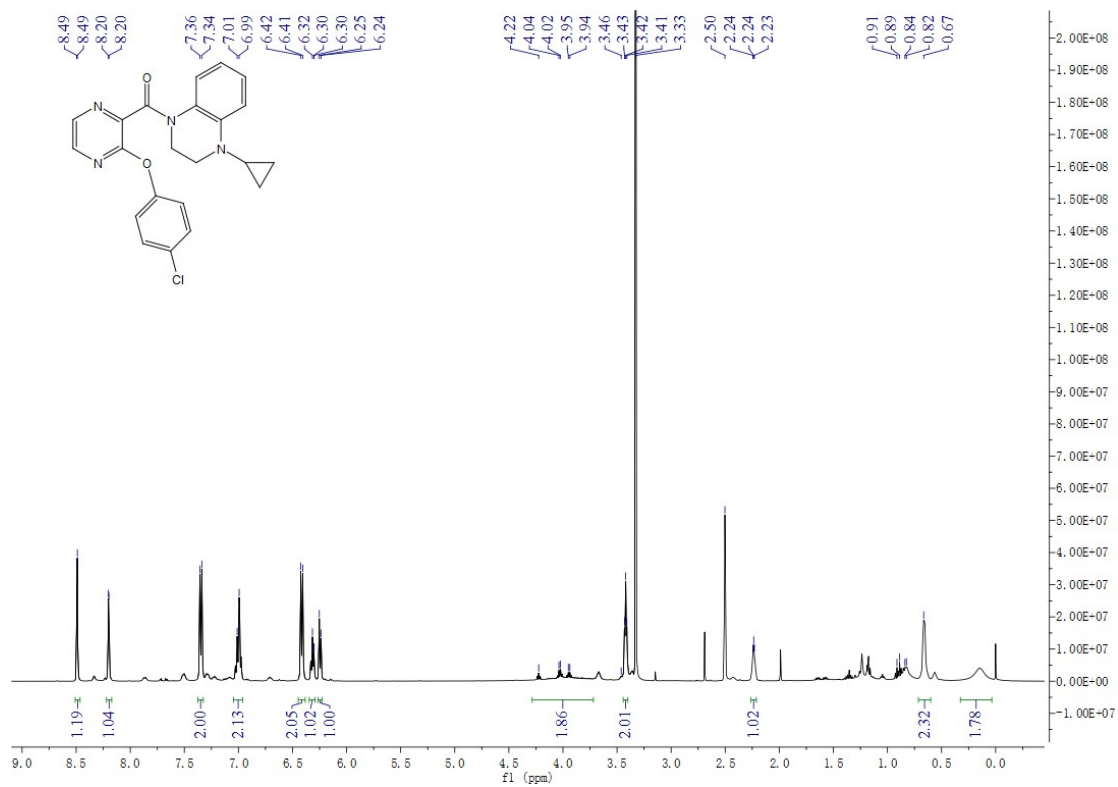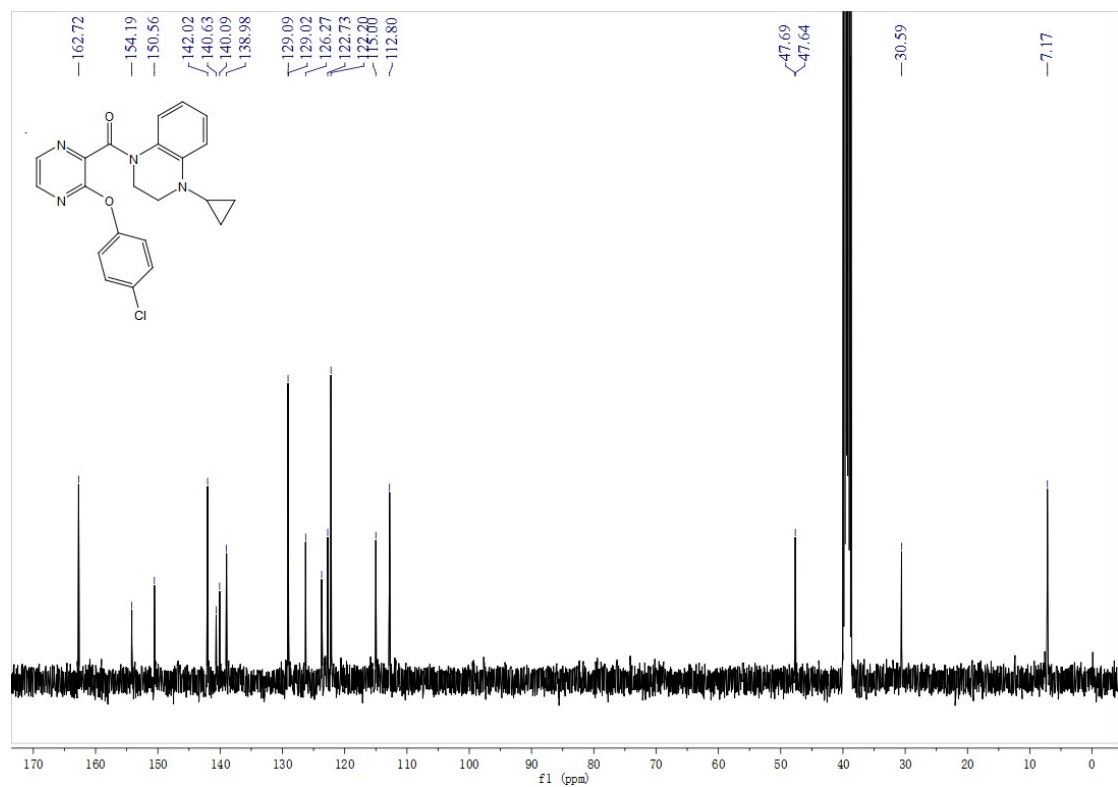

<sup>1</sup>H NMR and <sup>13</sup>C NMR spectra of **18e**

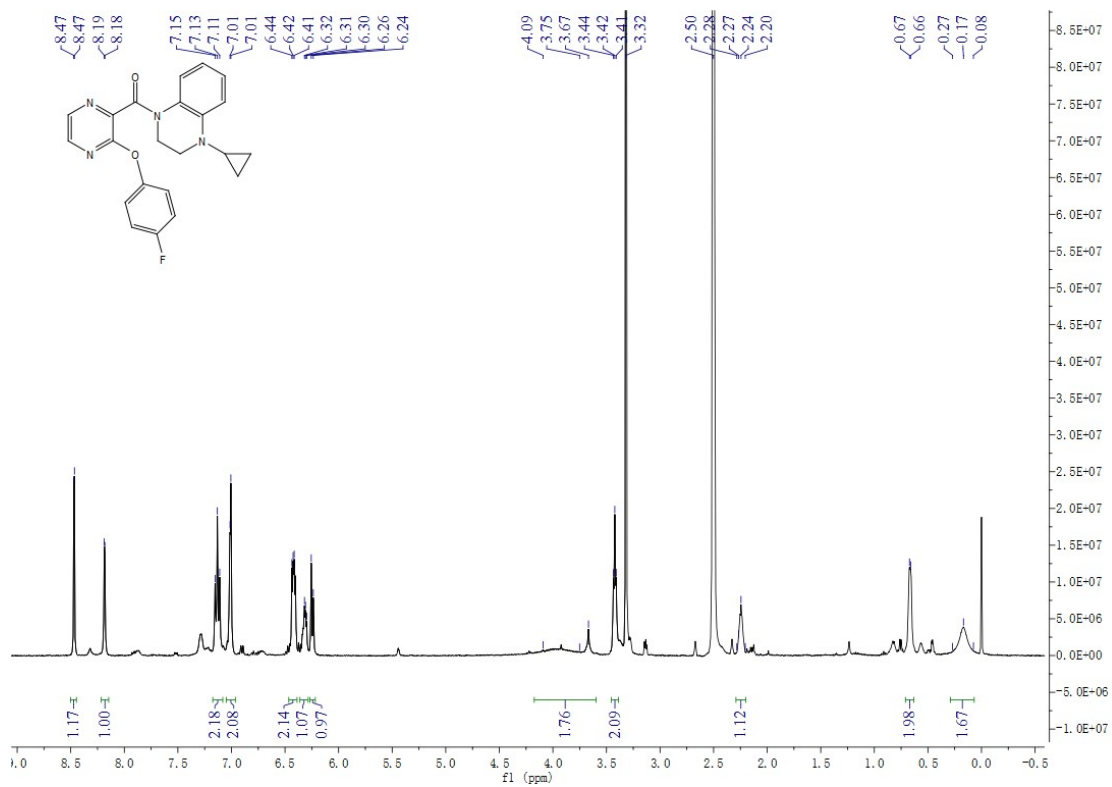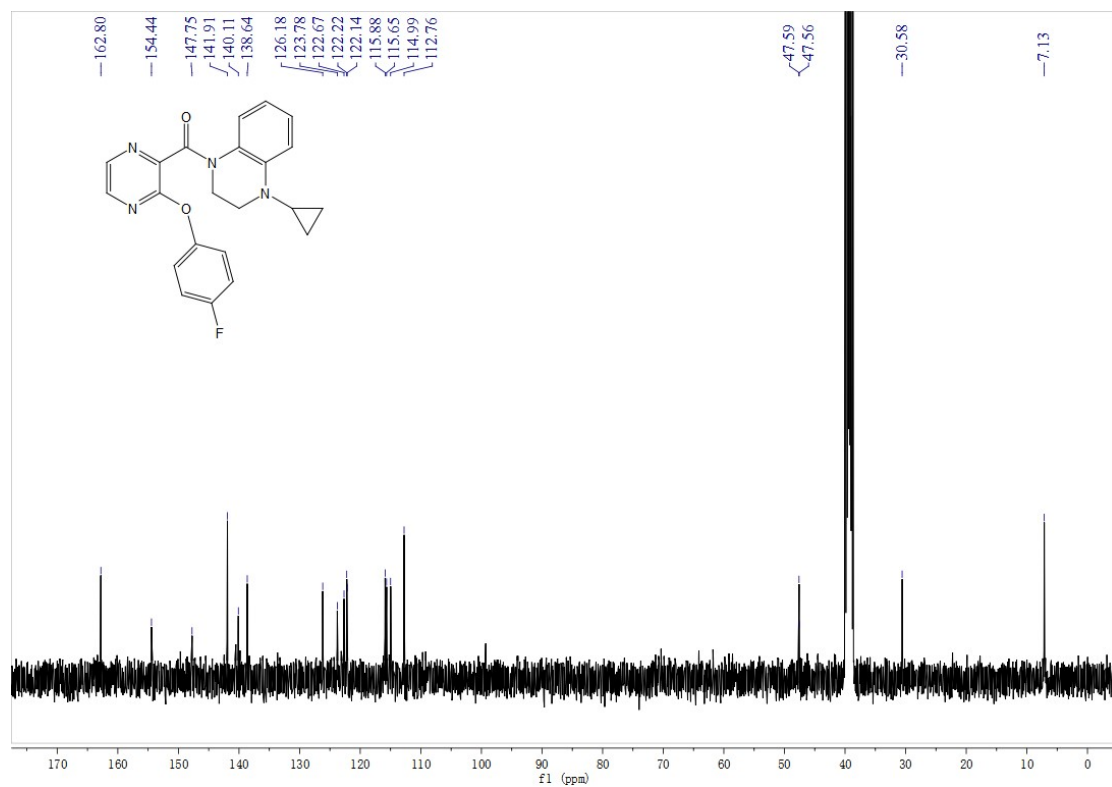

<sup>1</sup>H NMR and <sup>13</sup>C NMR spectra of **18f**

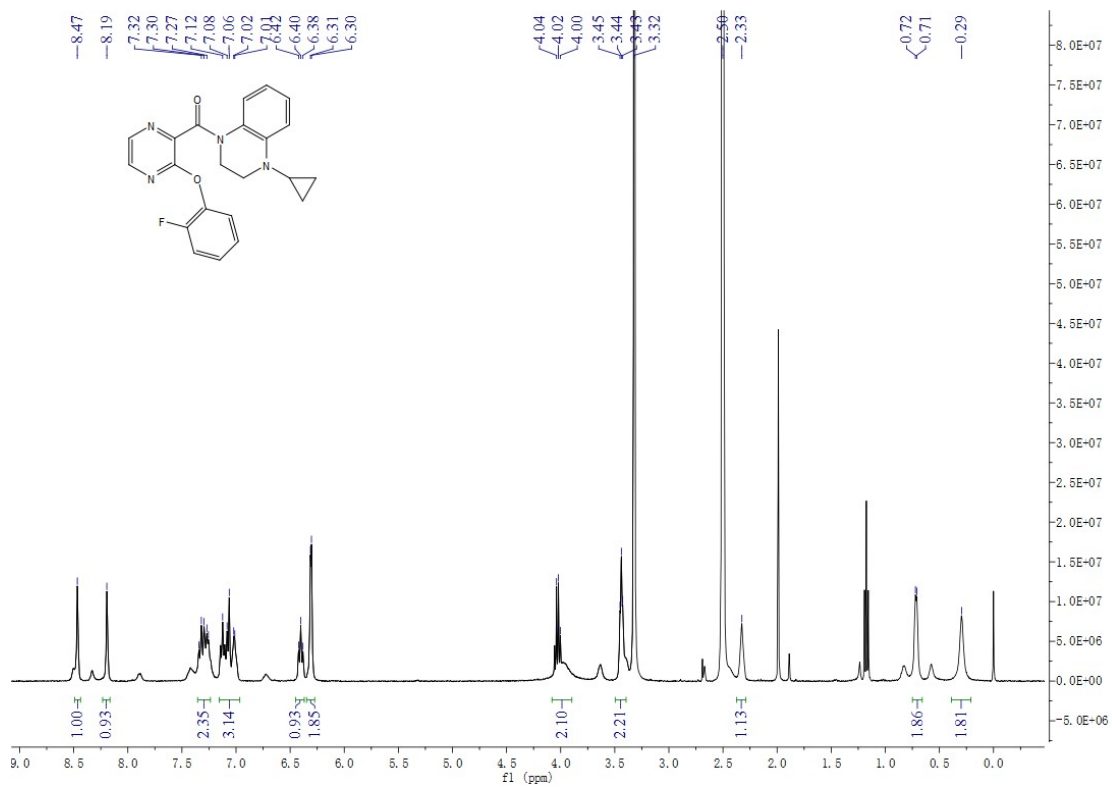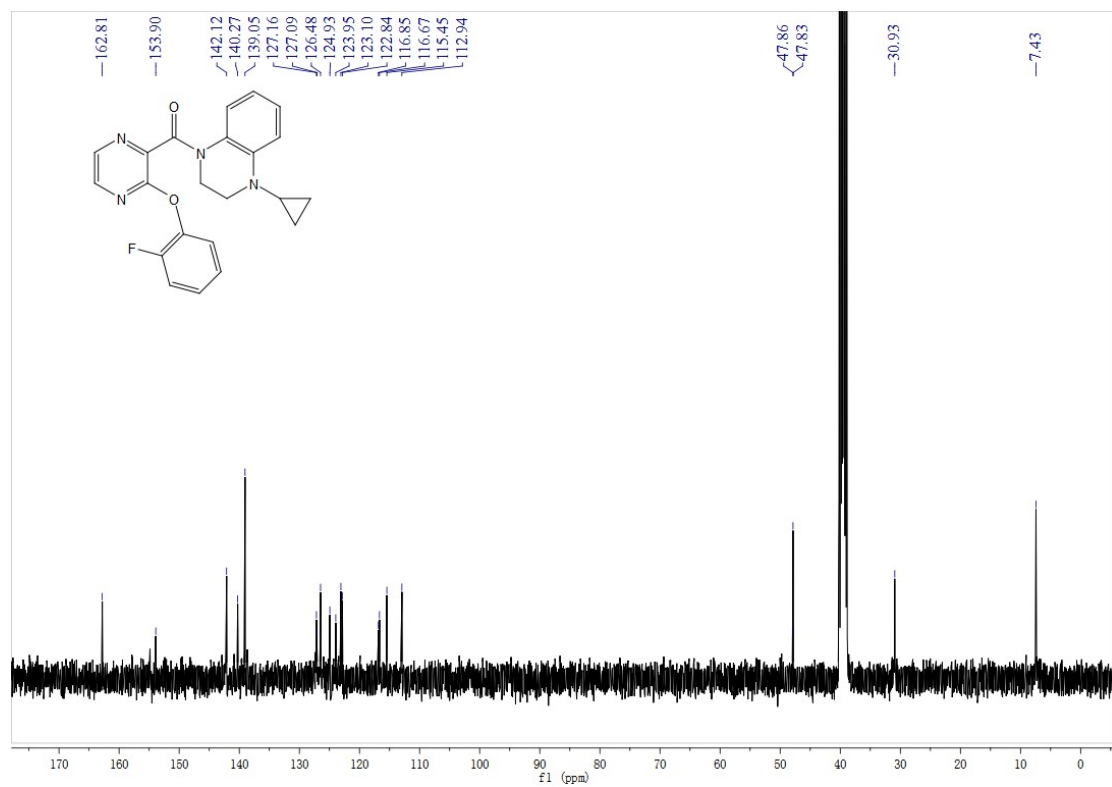

<sup>1</sup>H NMR and <sup>13</sup>C NMR spectra of **18g**

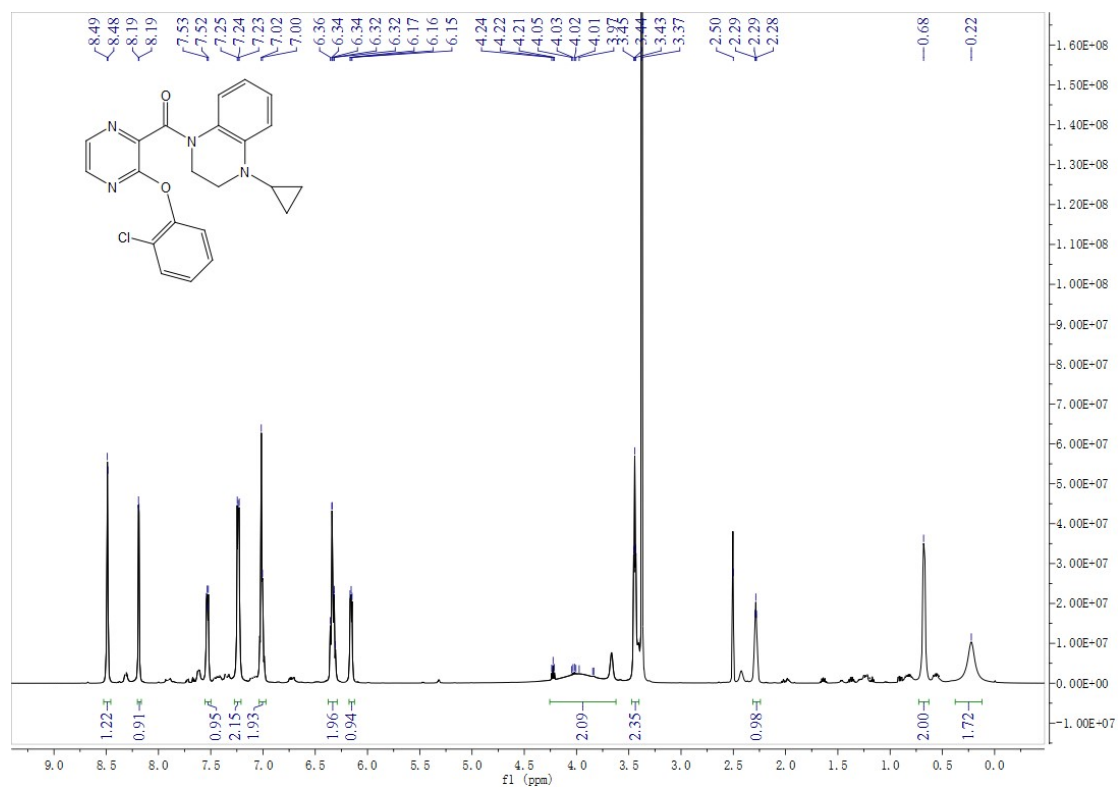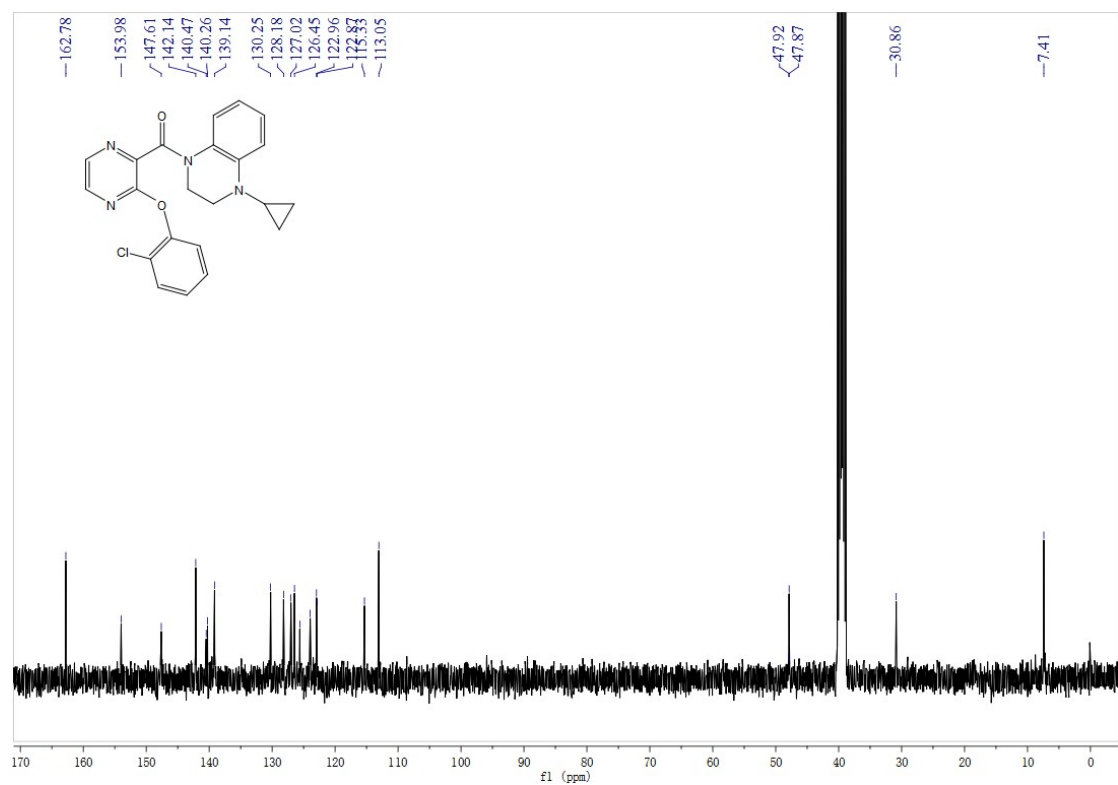

**<sup>1</sup>H NMR and <sup>13</sup>C NMR spectra of 18h**



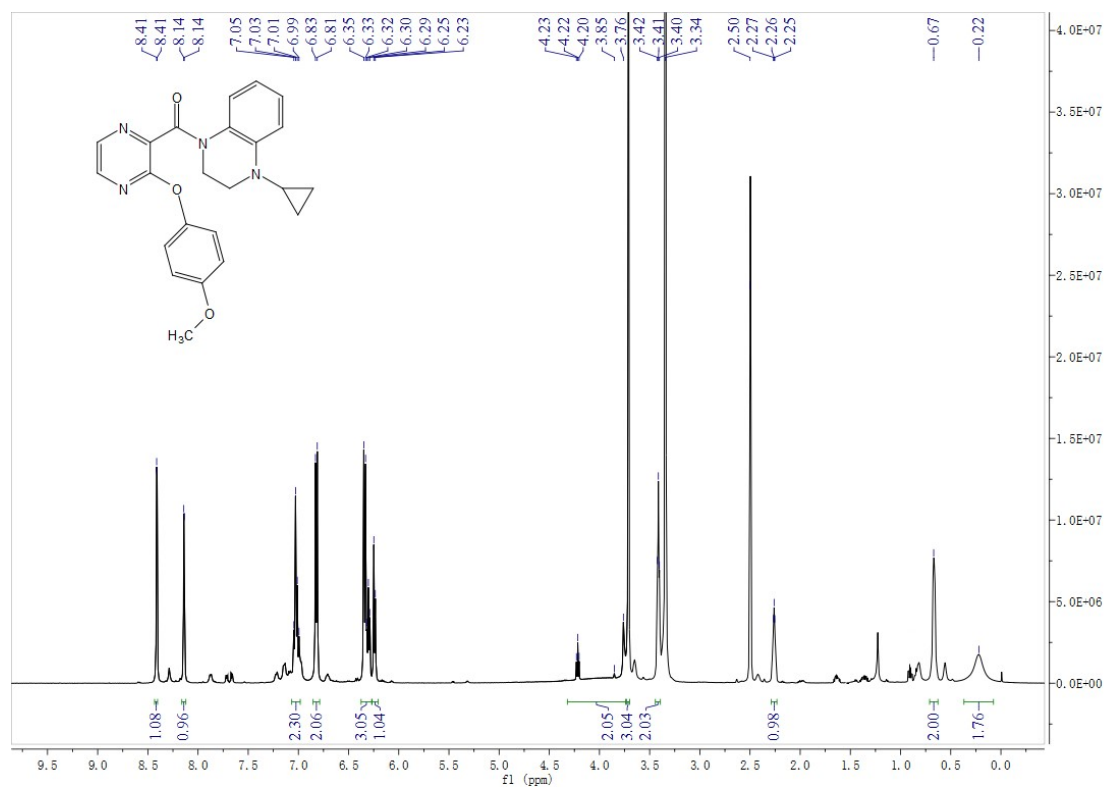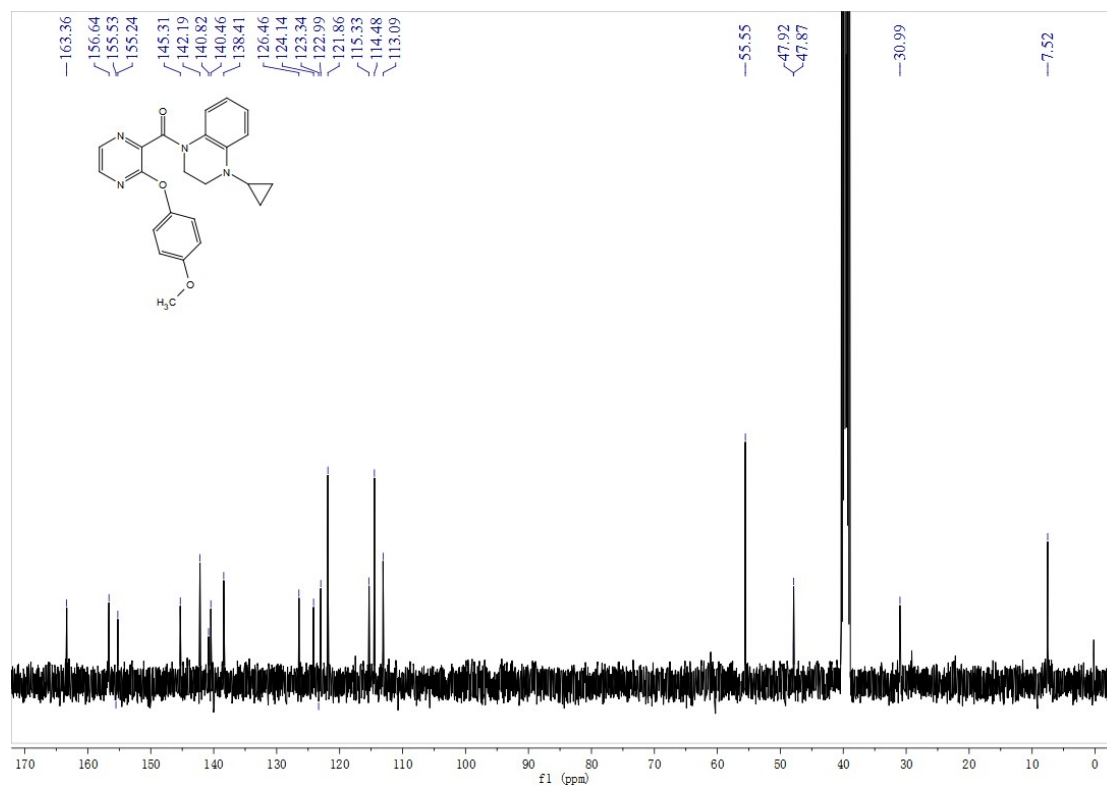

<sup>1</sup>H NMR and <sup>13</sup>C NMR spectra of **18i**

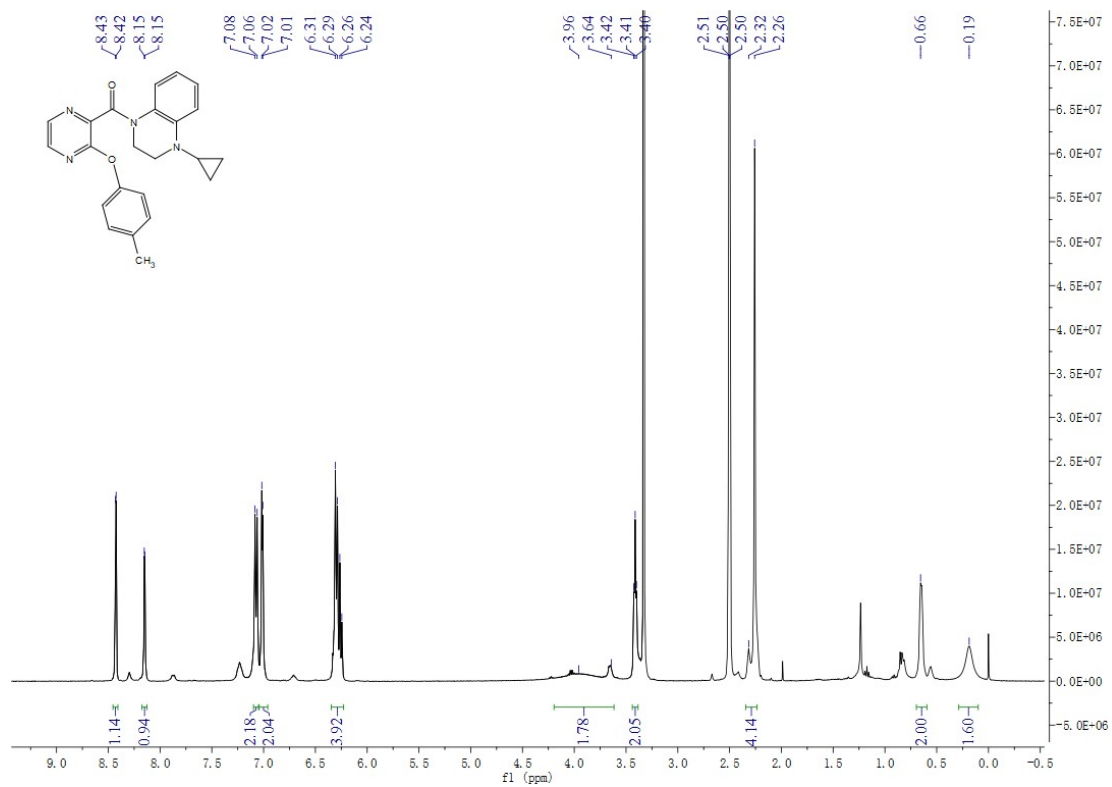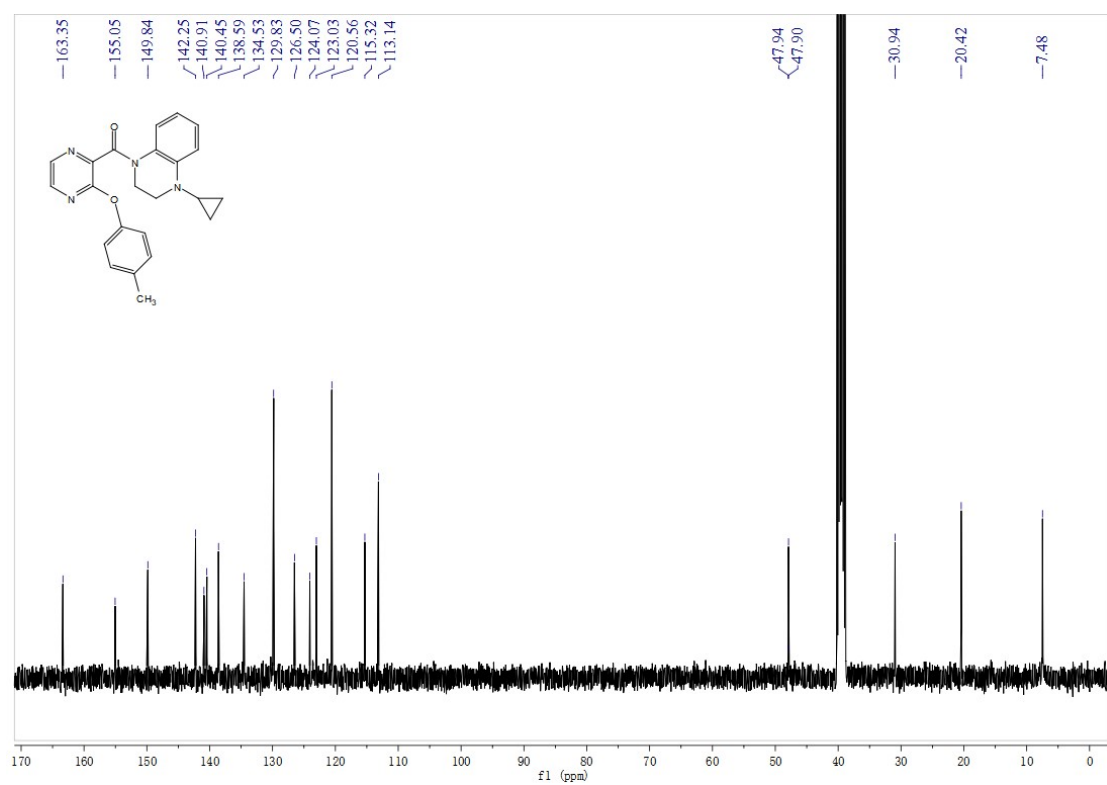

<sup>1</sup>H NMR and <sup>13</sup>C NMR spectra of 18j

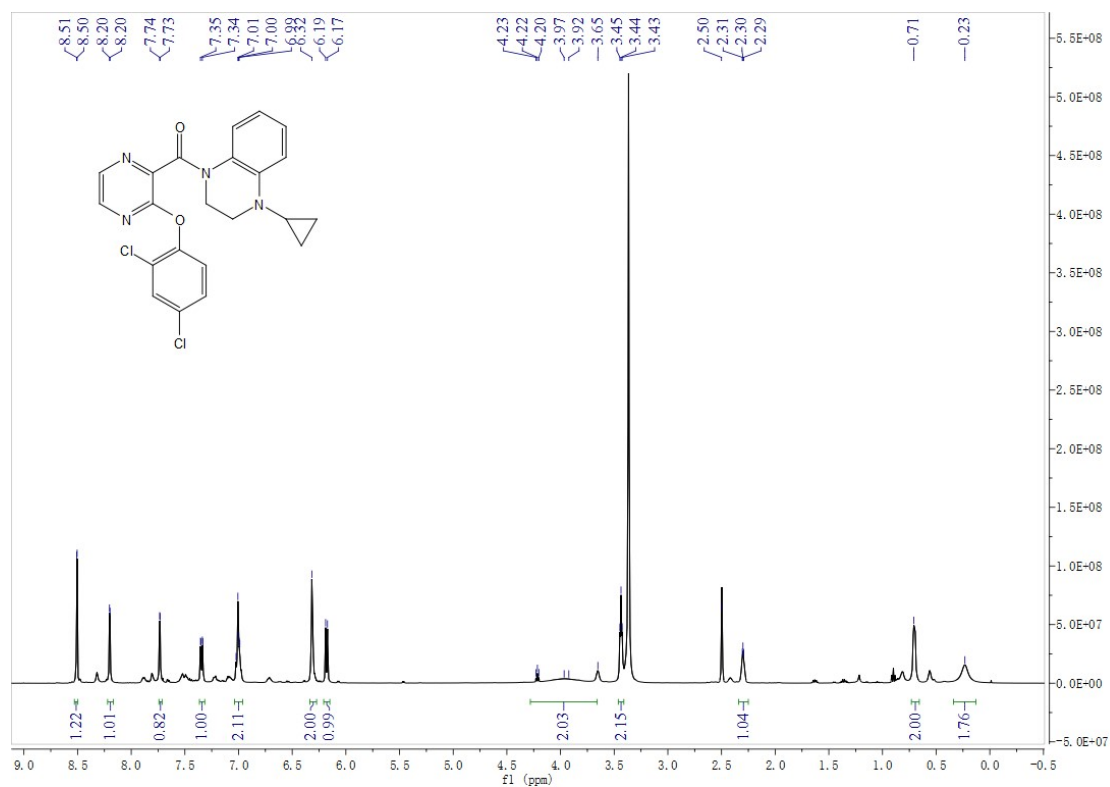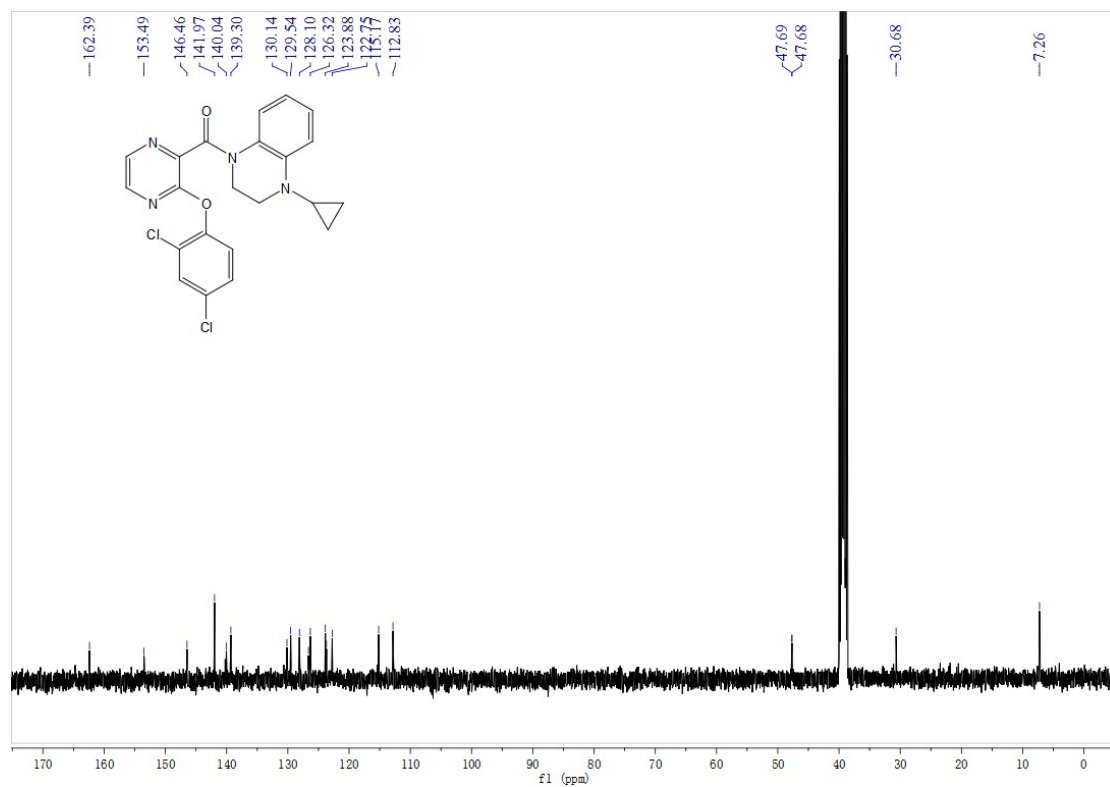

<sup>1</sup>H NMR and <sup>13</sup>C NMR spectra of **18k**

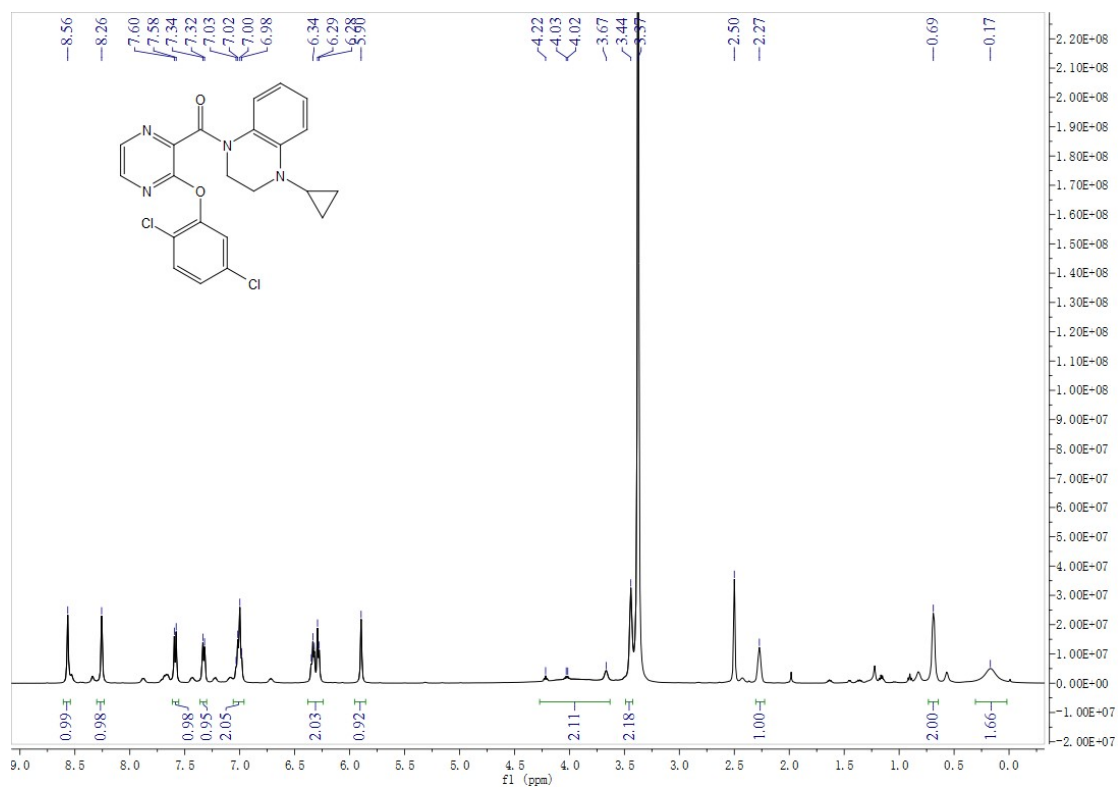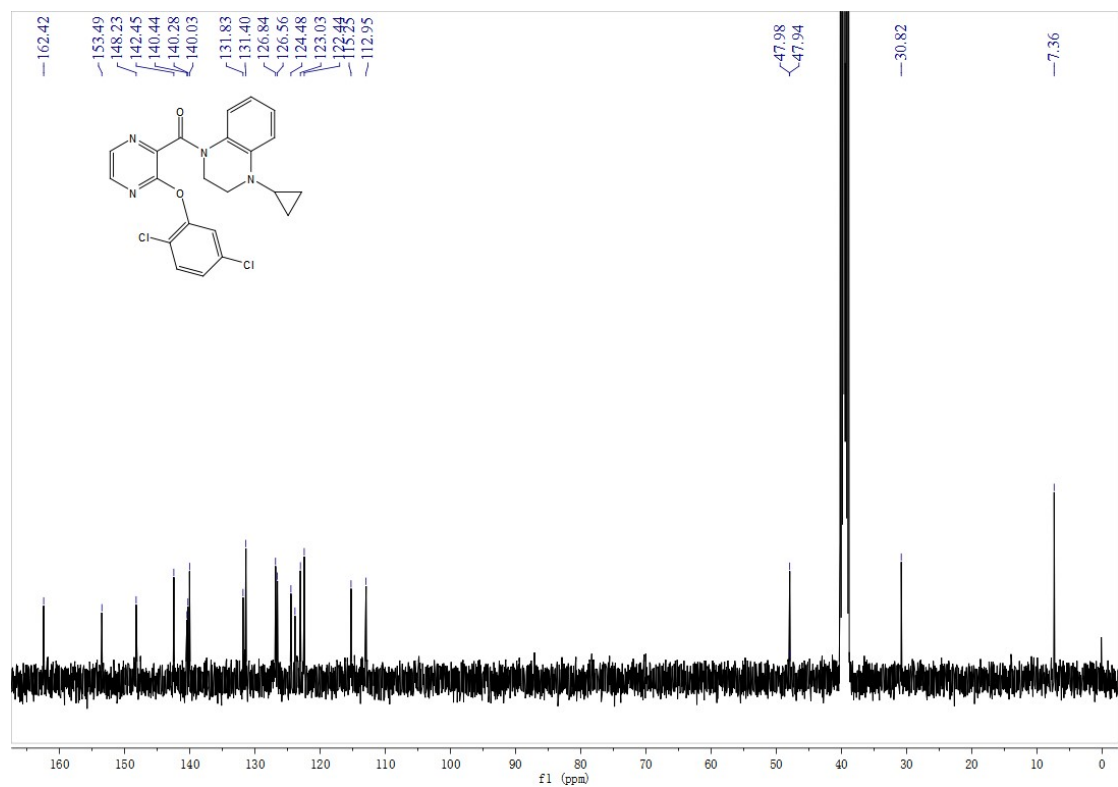

<sup>1</sup>H NMR and <sup>13</sup>C NMR spectra of **18**

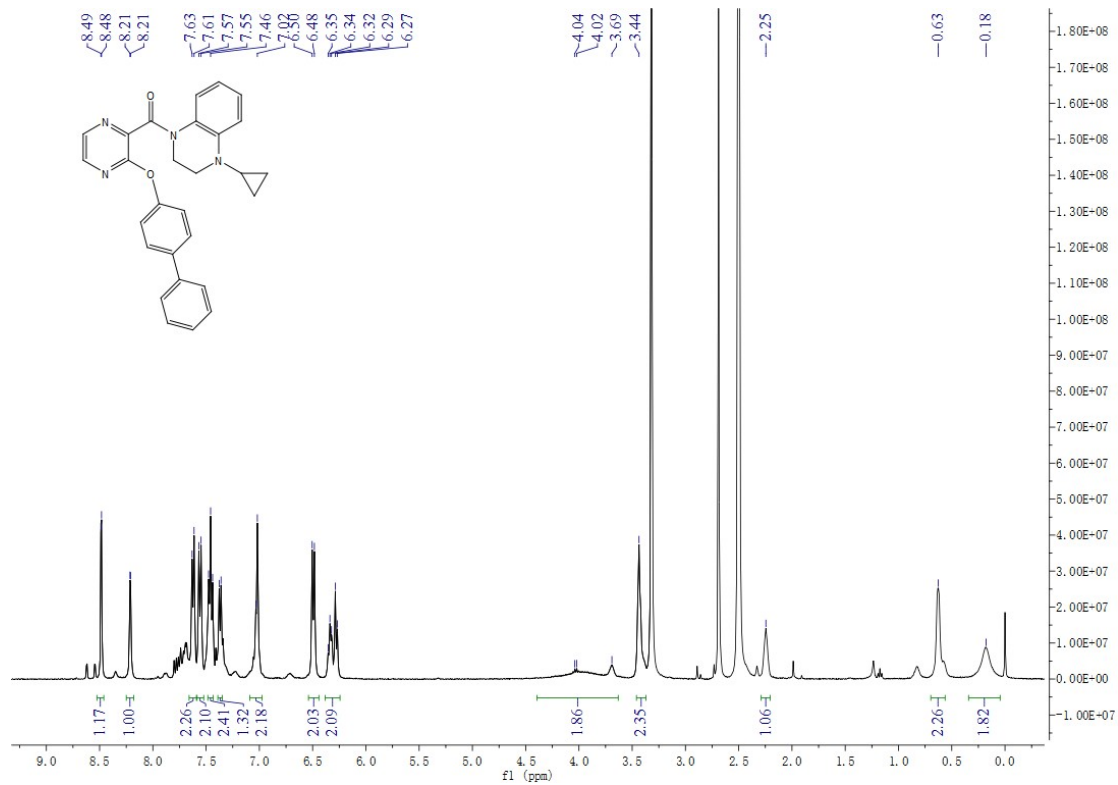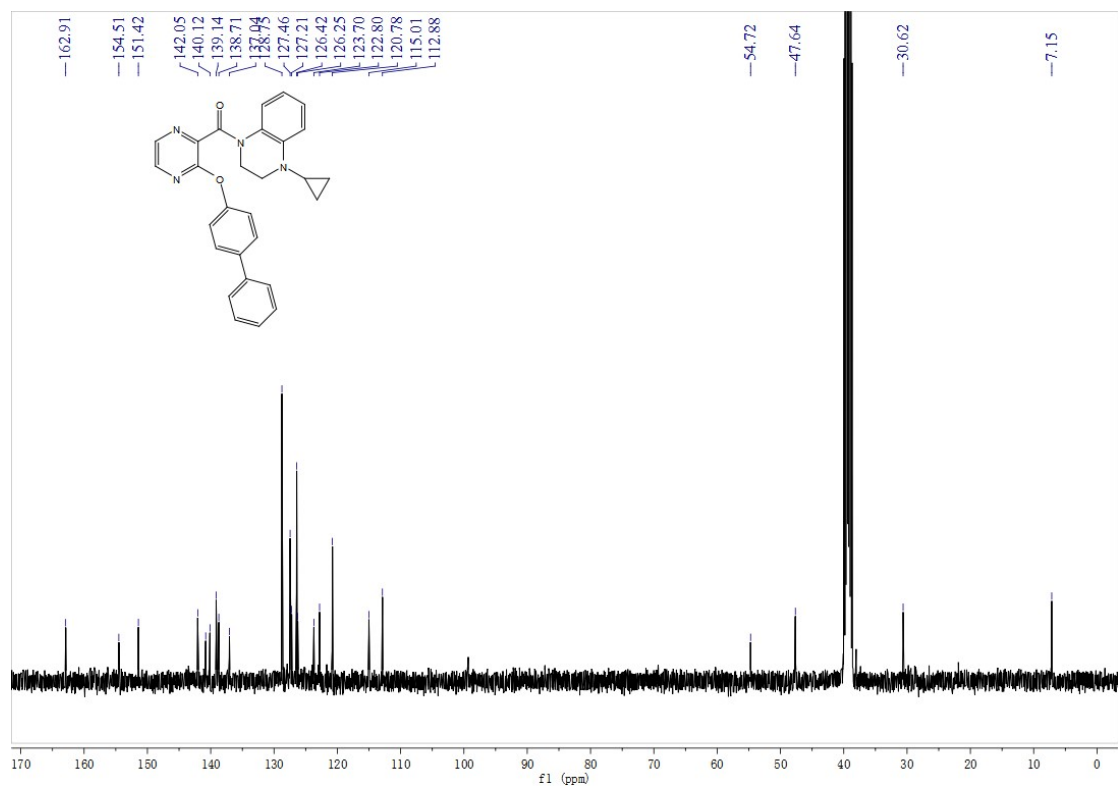

<sup>1</sup>H NMR and <sup>13</sup>C NMR spectra of **18m**

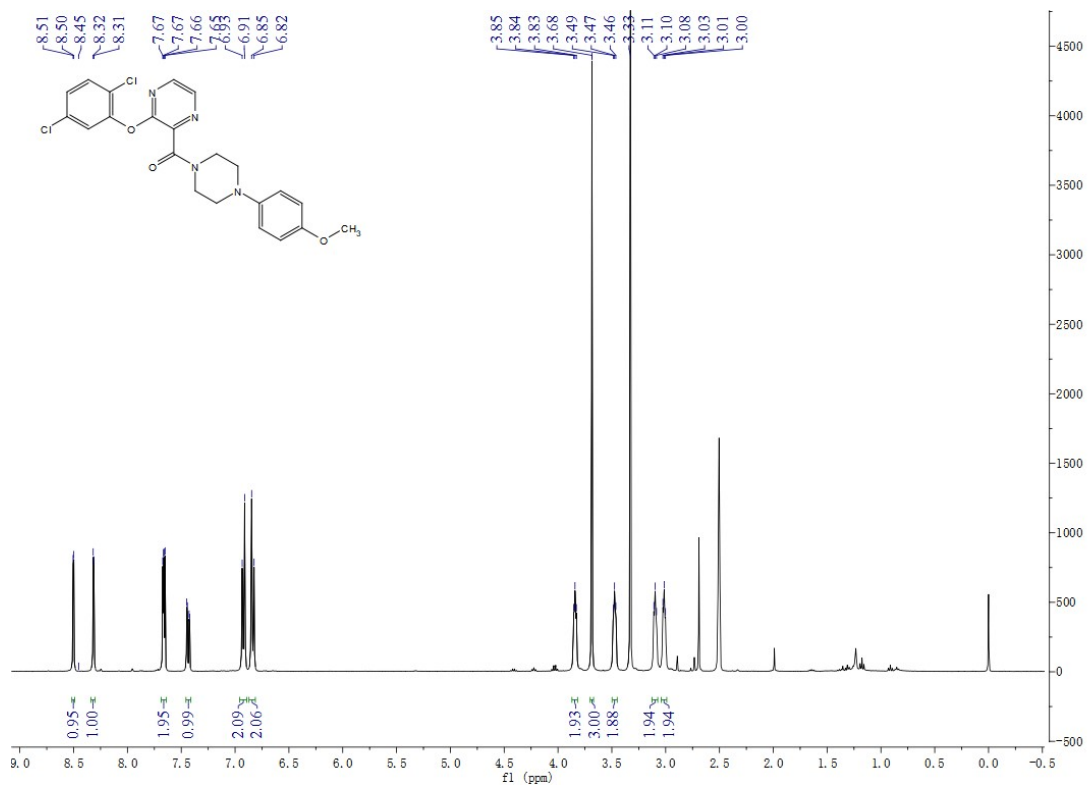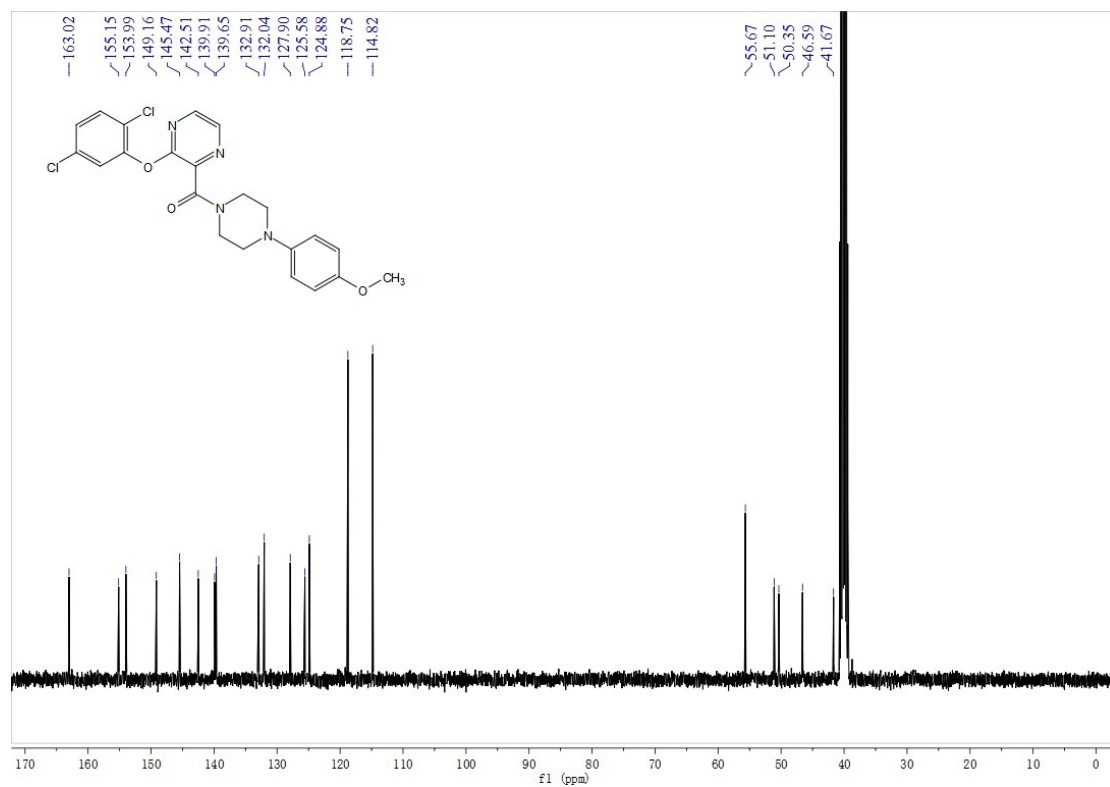

<sup>1</sup>H NMR and <sup>13</sup>C NMR spectra of **18n**

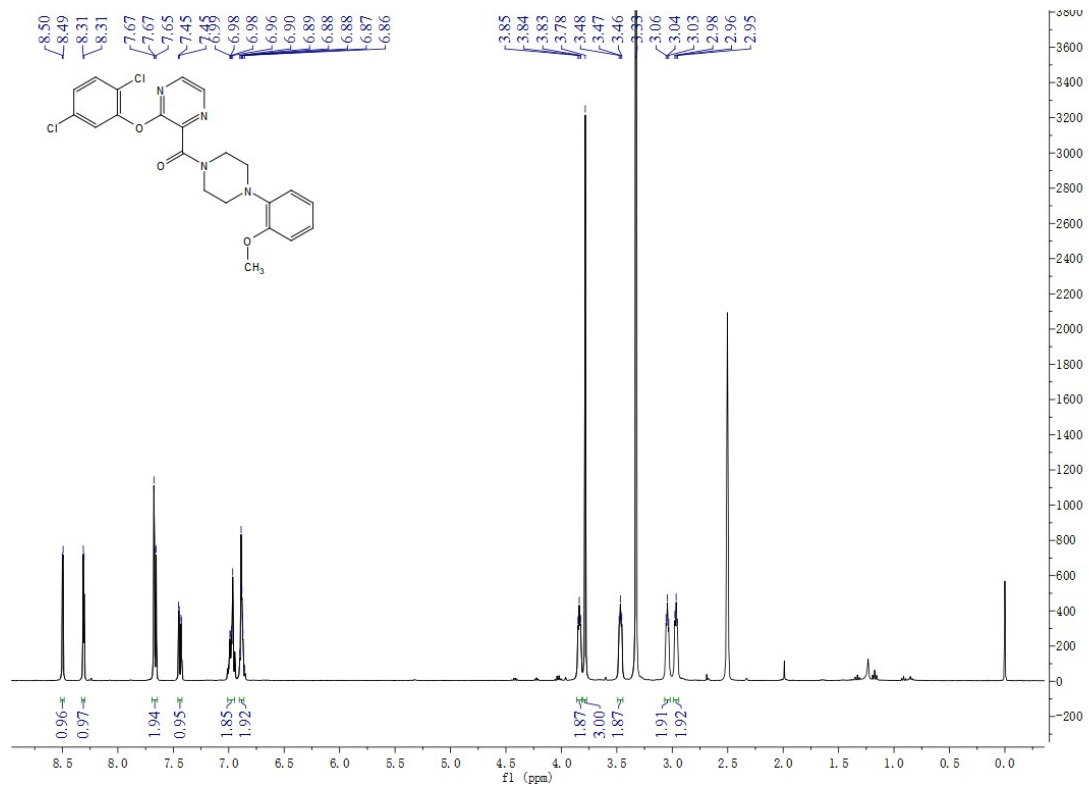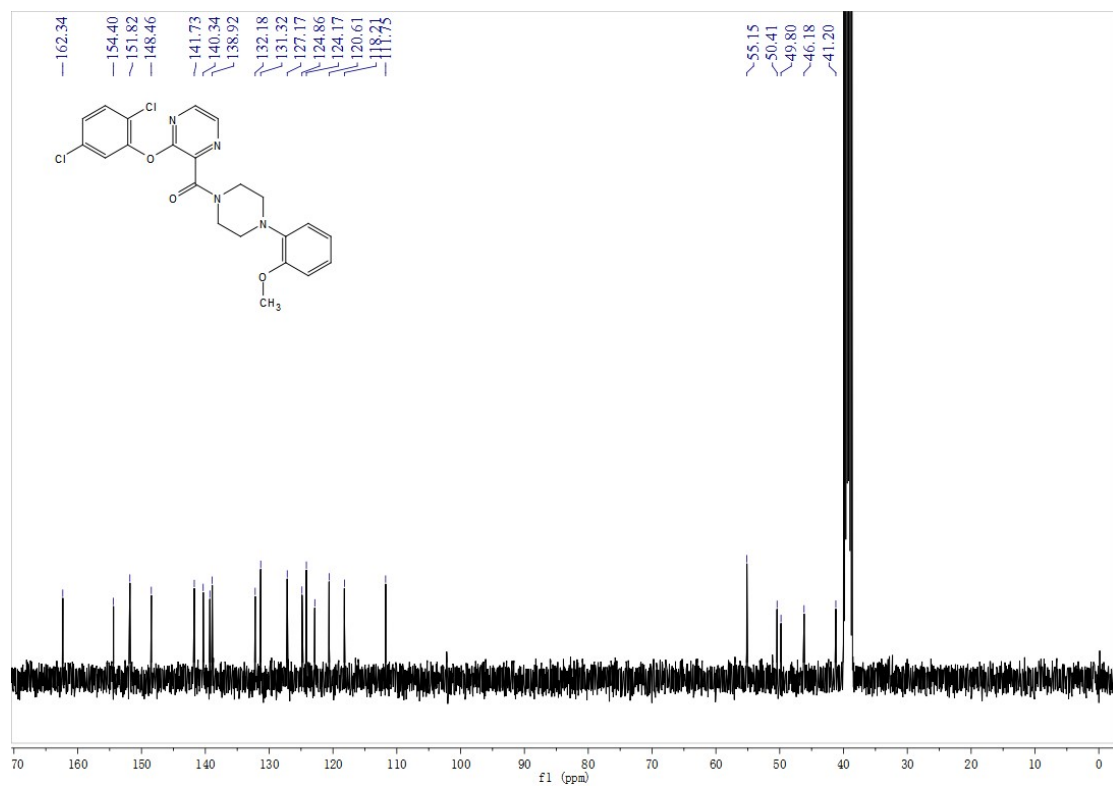

<sup>1</sup>H NMR and <sup>13</sup>C NMR spectra of **18o**

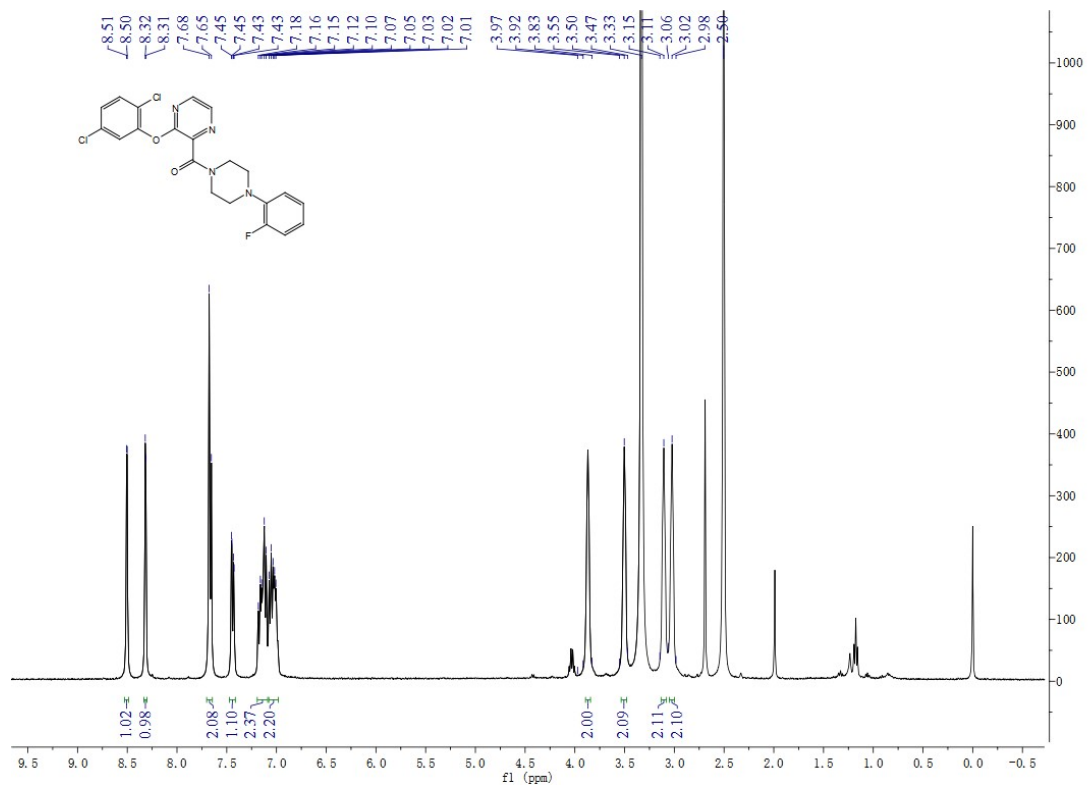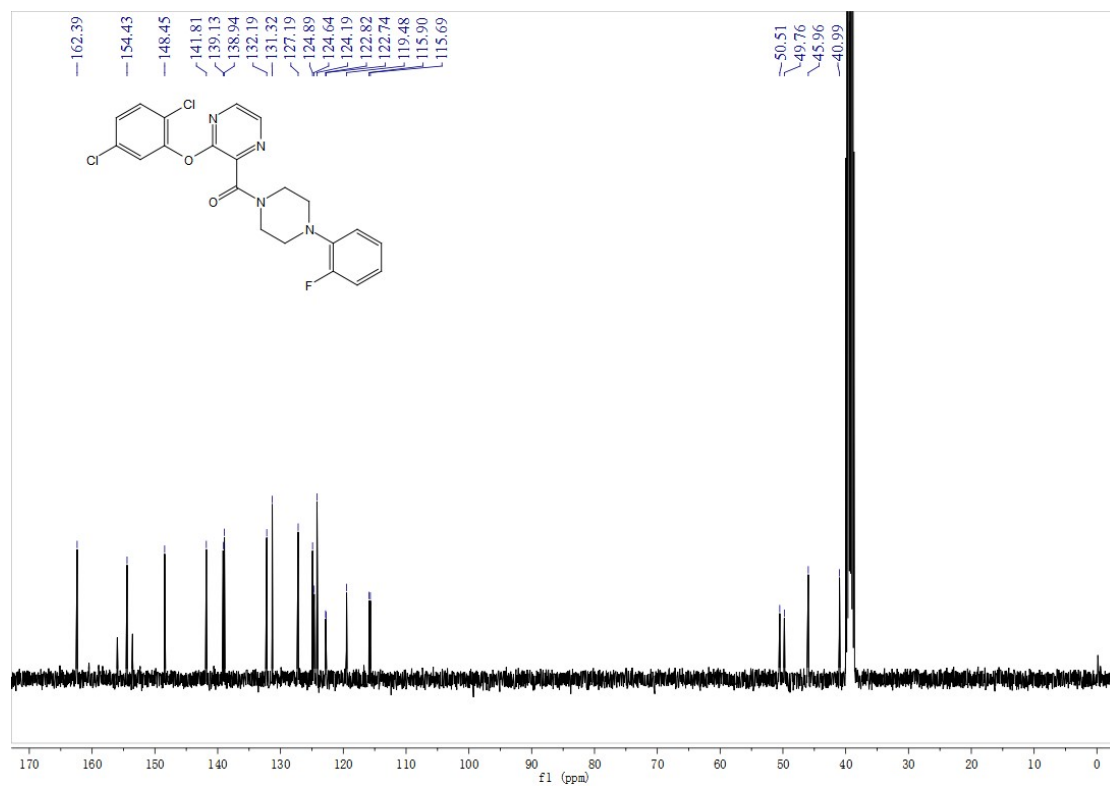

<sup>1</sup>H NMR and <sup>13</sup>C NMR spectra of **18p**



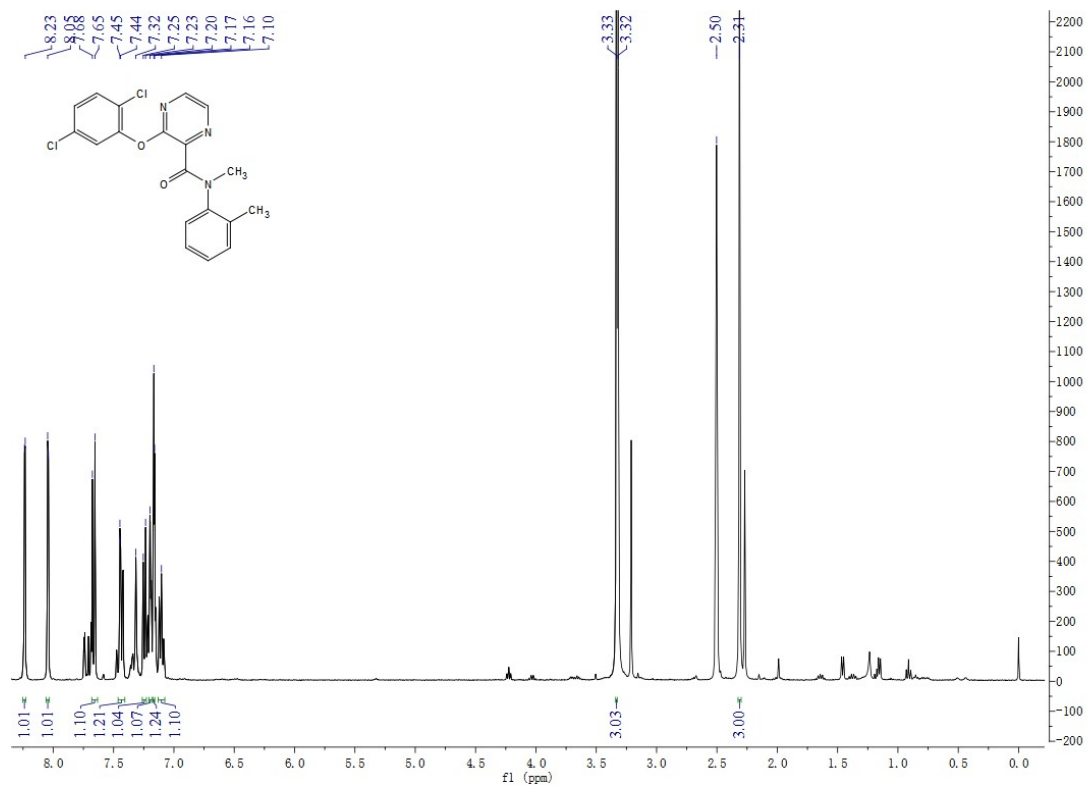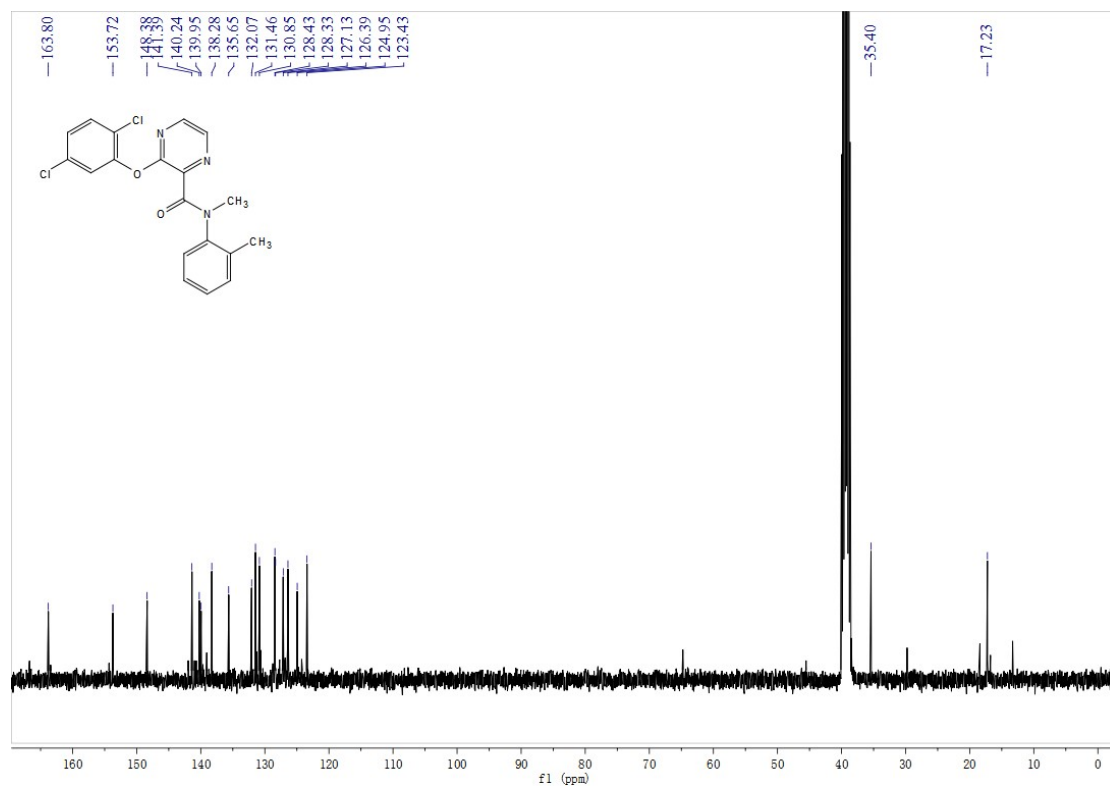

<sup>1</sup>H NMR and <sup>13</sup>C NMR spectra of 18q

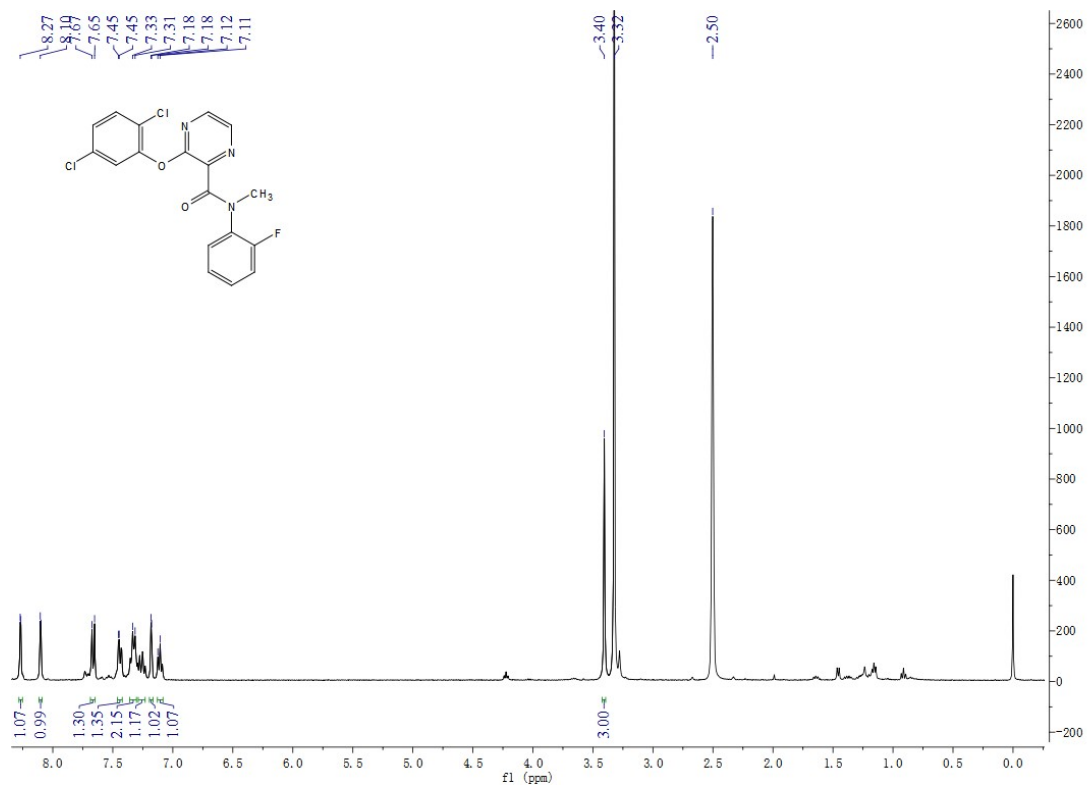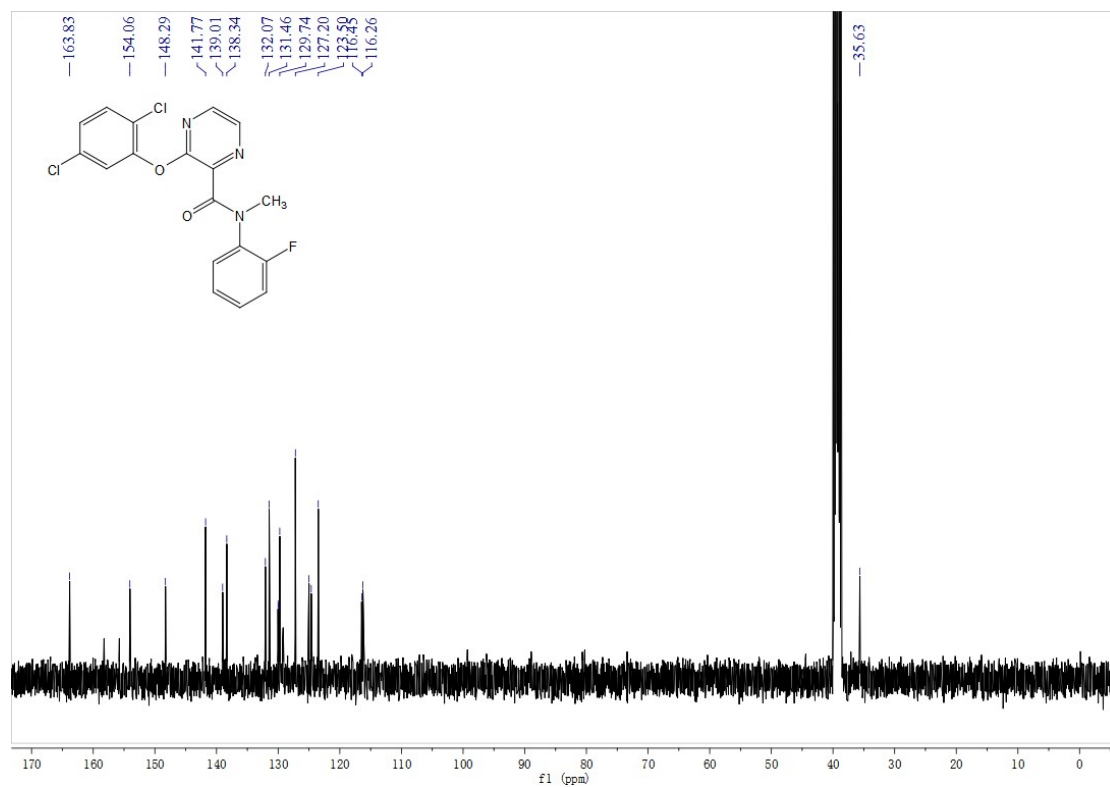

<sup>1</sup>H NMR and <sup>13</sup>C NMR spectra of **18r**

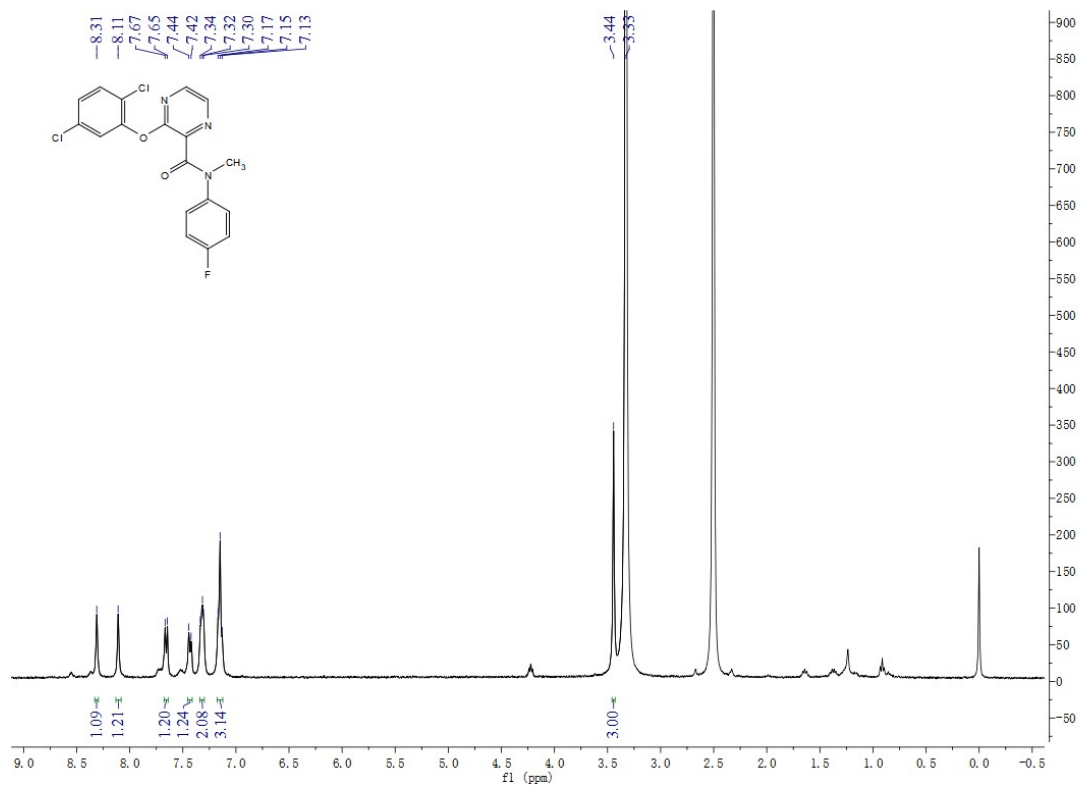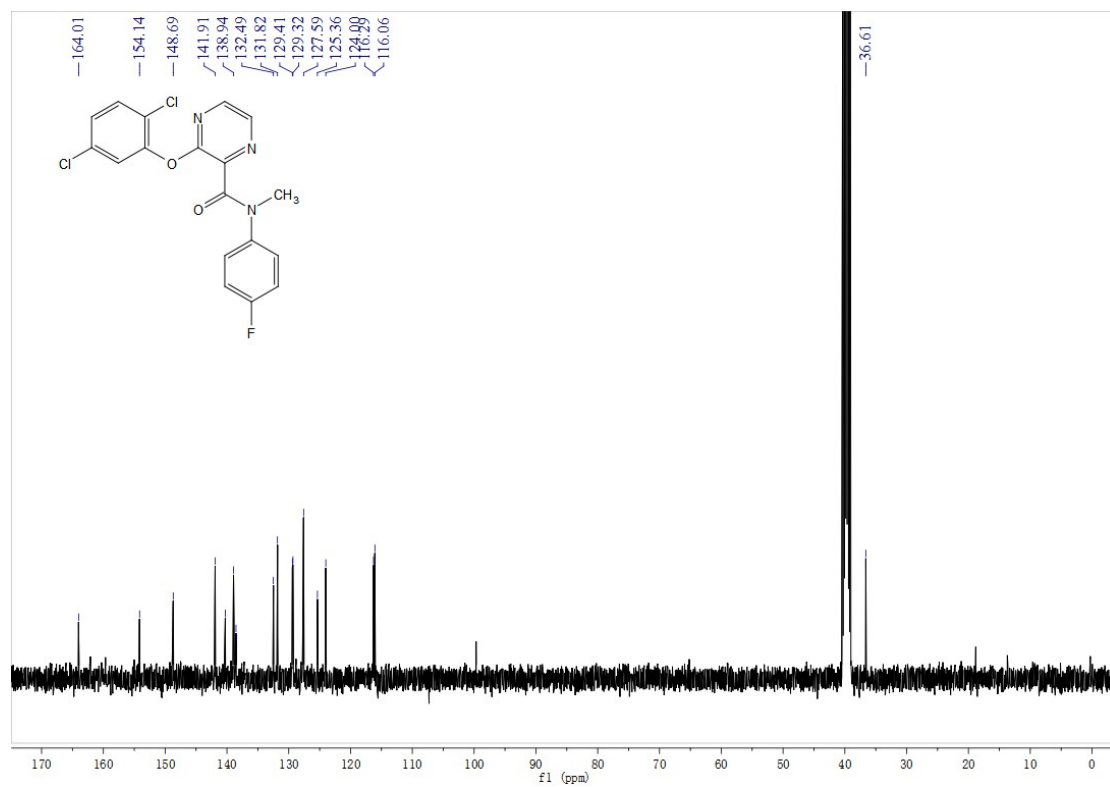

<sup>1</sup>H NMR and <sup>13</sup>C NMR spectra of **18s**

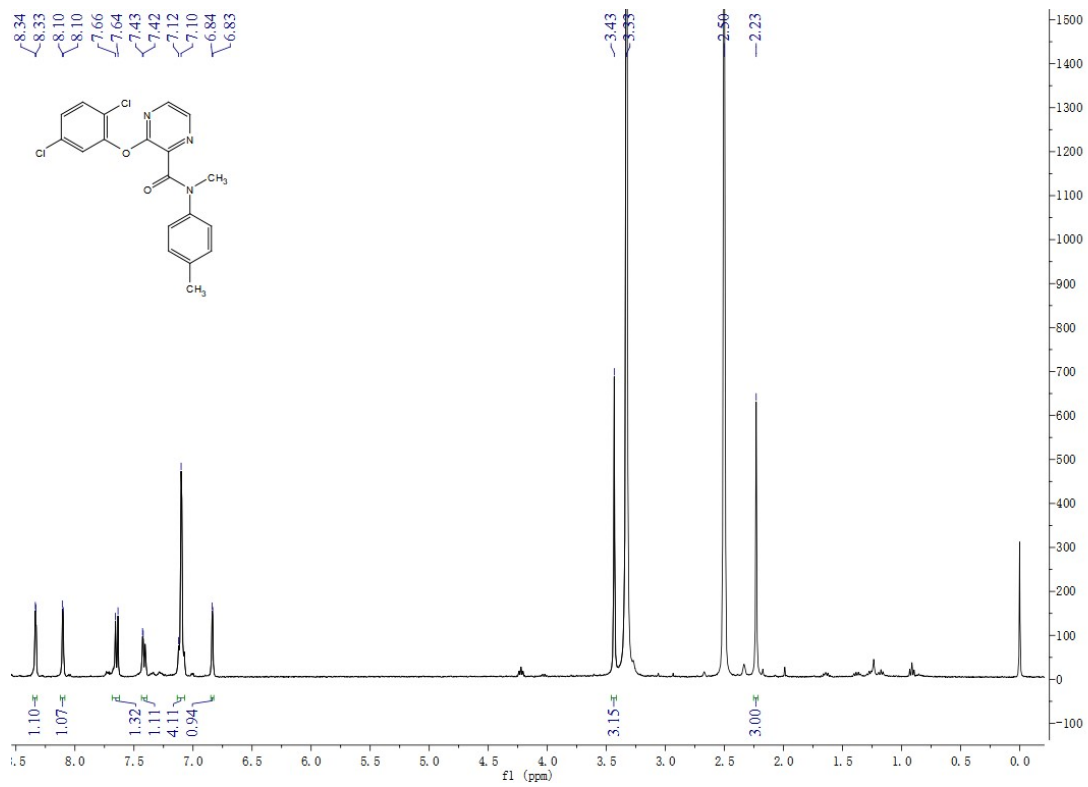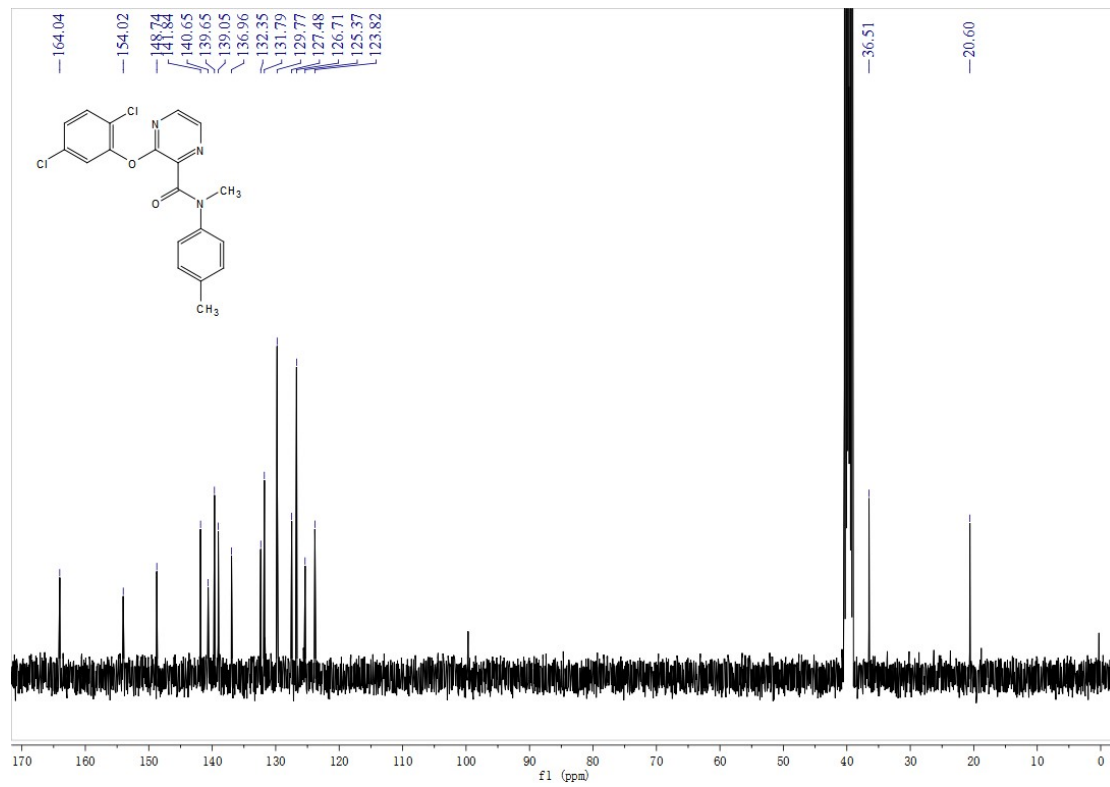

<sup>1</sup>H NMR and <sup>13</sup>C NMR spectra of 18t

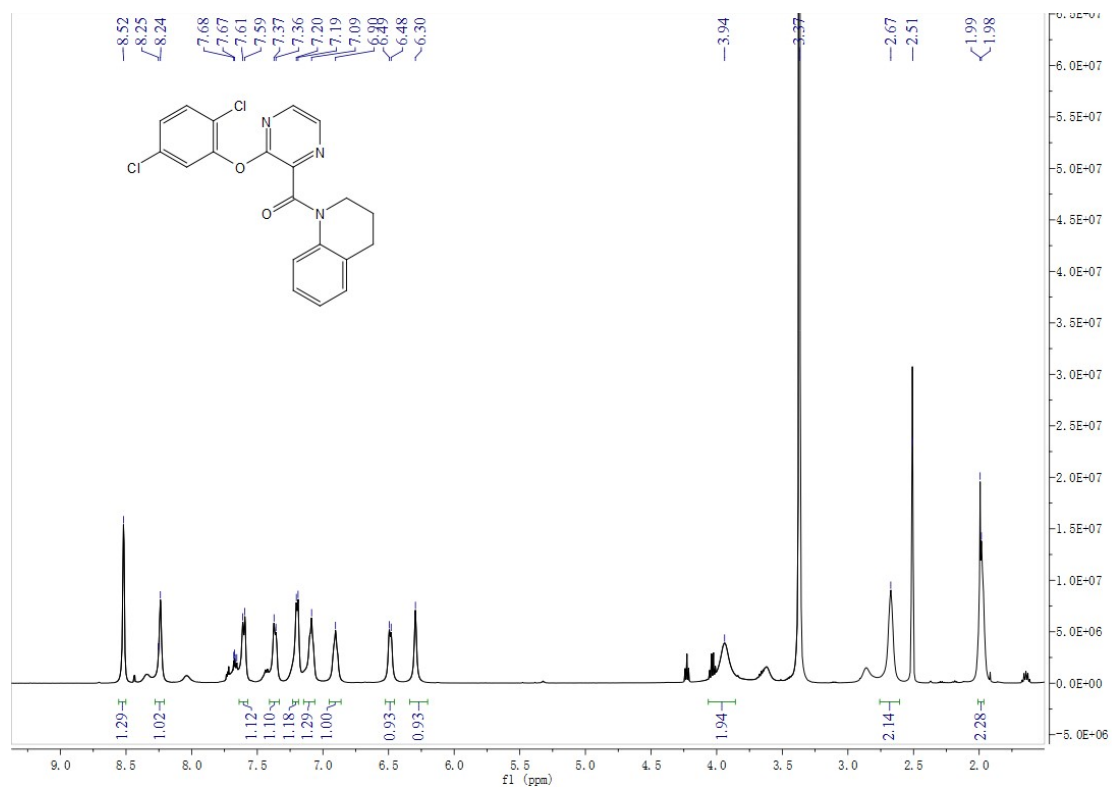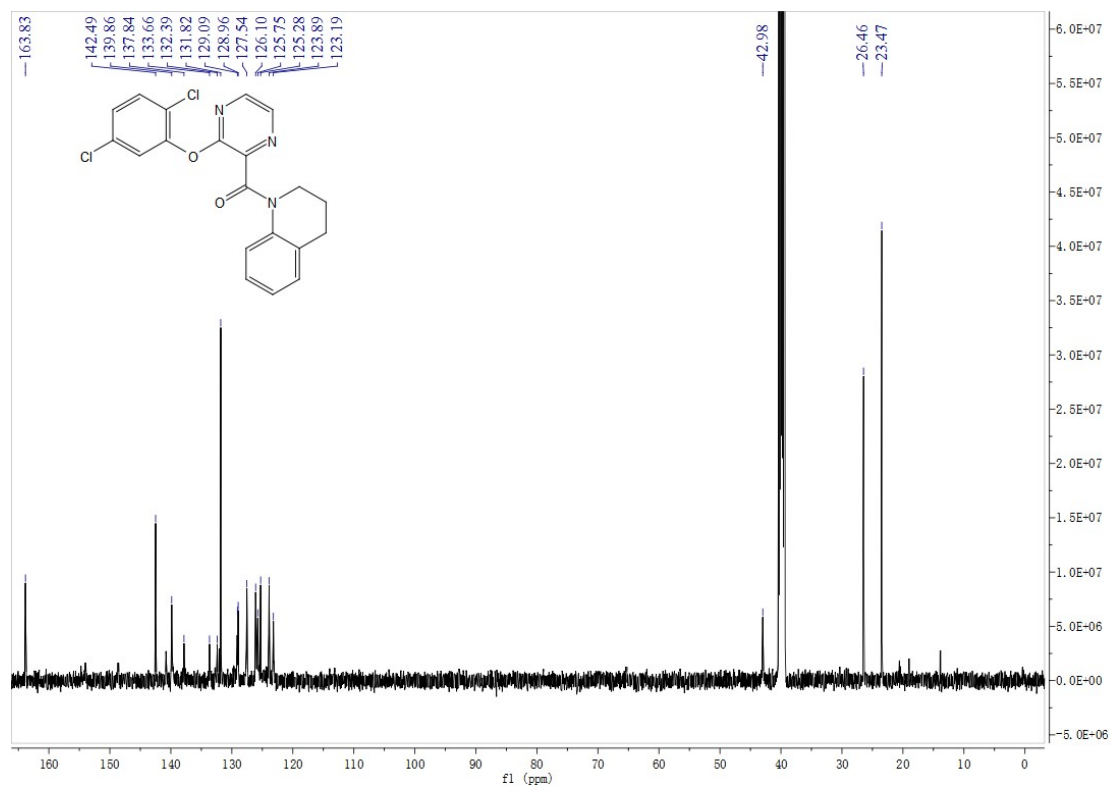

<sup>1</sup>H NMR and <sup>13</sup>C NMR spectra of **18u**

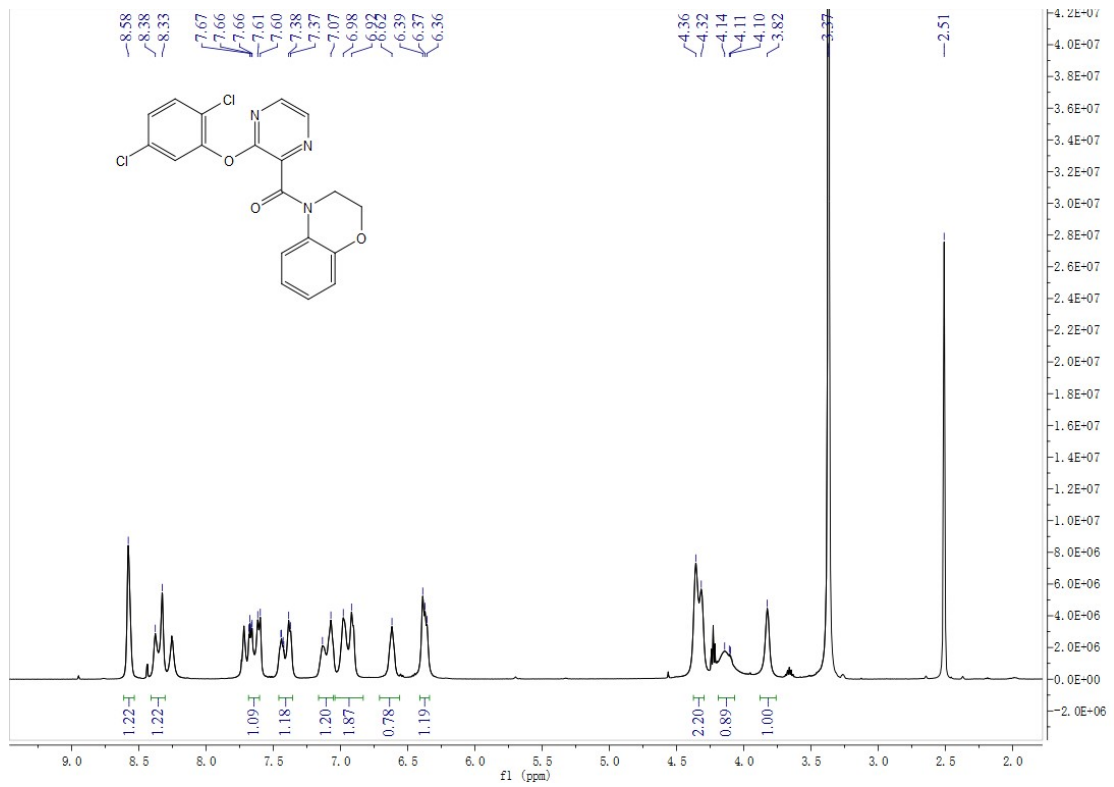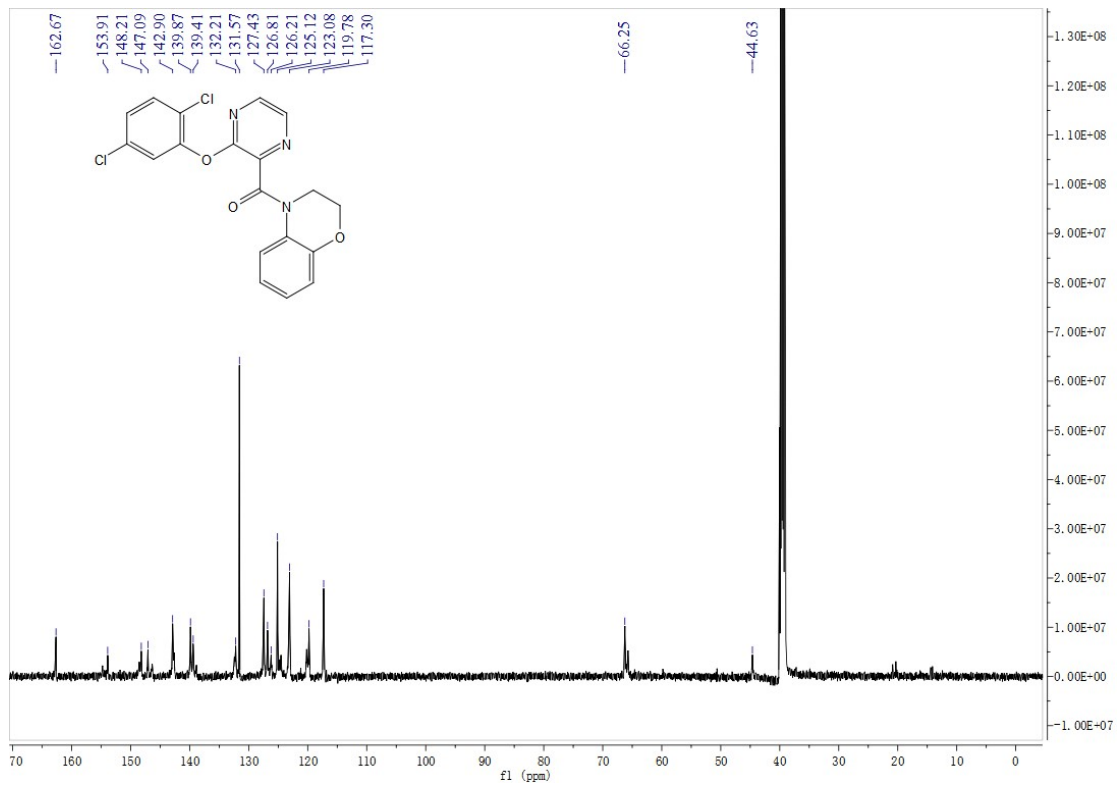

Supplement: d1ra08867j1.pdf [file d1ra08867j1.pdf]
